1 **Competition for fluctuating resources reproduces statistics of species abundance**  
2 **over time across wide-ranging microbiotas**

3

4 Po-Yi Ho<sup>1</sup>, Benjamin Good<sup>2</sup>, Kerwyn Casey Huang<sup>1,3,4,\*</sup>

5

6 <sup>1</sup>Department of Bioengineering, Stanford University, Stanford, CA 94305, USA

7 <sup>2</sup>Department of Applied Physics, Stanford University, Stanford, CA 94305, USA

8 <sup>3</sup>Department of Microbiology and Immunology, Stanford University School of Medicine,  
9 Stanford, CA 94305, USA

10 <sup>4</sup>Chan Zuckerberg Biohub, San Francisco, CA 94158

11

12 *Running title:* Resource competition reproduces time series statistics

13

14 *Keywords:* microbiome, macroecological dynamics, resource competition, gut microbiota,  
15 vaginal microbiota, plant microbiota

16 **Abstract**

17 Across diverse microbiotas, species abundances vary in time with distinctive statistical  
18 behaviors that appear to generalize across hosts, but the origins and implications of these  
19 patterns remain unclear. Here, we show that many of these patterns can be quantitatively  
20 recapitulated by a simple class of resource-competition models, in which the metabolic  
21 capabilities of different species are randomly drawn from a common statistical ensemble.  
22 Our coarse-grained model parametrizes the intrinsic consumer-resource properties of a  
23 community using a small number of macroscopic parameters, including the total number  
24 of resources, typical resource fluctuations over time, and the average overlap in resource-  
25 consumption profiles across species. We elucidate how variation in these parameters  
26 affects various time series statistics, enabling macroscopic parameter estimation and  
27 comparison across wide-ranging microbiotas, including the human gut, saliva, and  
28 vagina, as well as mouse gut and rice. The successful recapitulation of time series  
29 statistics across microbiotas suggests that resource competition generally acts as a  
30 dominant driver of community dynamics. Our work unifies numerous time series patterns  
31 under one model, clarifies their origins, and provides a framework to infer macroscopic  
32 parameters of resource competition from longitudinal studies of microbial communities.

## 33 Introduction

34 Microbial communities are ubiquitous across our planet, and strongly affect host and  
35 environmental health<sup>1,2</sup>. Predictive models for microbial community dynamics would  
36 accelerate efforts to engineer microbial communities for societal benefits. A well-studied  
37 class is consumer-resource (CR) models, wherein species growth is determined by the  
38 consumption of environmental resources<sup>3</sup>. CR models capture a core set of interactions  
39 among members of a community based on their competition for nutrients, and have  
40 demonstrated the capacity to recapitulate important properties of microbial communities  
41 such as diversity and stability<sup>4,5</sup>, despite neglecting potential interaction mechanisms  
42 beyond resource competition. Model parameters such as resource consumption rates are  
43 beginning to be uncovered in the context of *in vitro* experiments<sup>6,7</sup>. However, a systematic  
44 connection between CR models and complex *in vivo* systems is lacking.

45  
46 A common strategy for interrogating *in vivo* microbiotas is longitudinal sampling followed  
47 by 16S amplicon or metagenomic sequencing, thereby generating a relative abundance  
48 time series. Analyses of longitudinal data have shown that species abundances fluctuate  
49 around stable, host-specific values in healthy humans<sup>8-10</sup>. Recently, it was discovered that  
50 such time series exhibit distinctive statistical signatures, sometimes referred to as  
51 macroecological dynamics<sup>11-14</sup>. For example, in human and mouse gut microbiotas, the  
52 variance versus mean abundance over time scales across species as a power law,  
53 recapitulating the empirical Taylor's law observed in many ecosystems<sup>15</sup>. Taylor's law  
54 and other statistical behaviors encode properties of the community and its environment;  
55 for example, deviations from Taylor's law can highlight species that are transient  
56 invaders<sup>11</sup>. More broadly, the relative contributions of intrinsic versus environmental  
57 processes can be distinguished by modeling time series using autoregressive models  
58 whose output values depend linearly on values at previous times and external noise<sup>16</sup>.  
59 Abundance time series can be correlated to environmental metadata such as diet to  
60 generate hypotheses about how environmental perturbations affect community  
61 composition<sup>10</sup>. Time series analyses can also identify transitions between distinct  
62 ecological states<sup>17</sup>. Some statistical behaviors can be recapitulated by phenomenological  
63 models, such as a non-interacting, constrained random walk in abundances<sup>12</sup> or a

64 generalized Lotka-Volterra model with colored noise<sup>13</sup>. Similarly, ecological models  
65 describing the birth, immigration, and death of species have been used to analyze the  
66 distributions of abundance changes and abundance-prevalence relationships<sup>18</sup>.  
67 Nonetheless, the origins of and relationships among many of the statistical behaviors  
68 exhibited by host-associated microbiotas remain unclear.

69  
70 Here we show that many of the observed statistical behaviors can be quantitatively  
71 recapitulated by a simple resource competition model, in which species abundance  
72 fluctuations arise solely from external fluctuations in resource levels. The resource  
73 consumption network of such a community will typically depend on thousands of  
74 underlying parameters. We sought to overcome this combinatorial complexity by adopting  
75 a coarse-grained approach, in which resources describe effective groupings of  
76 metabolites or niches, and model parameters are randomly drawn from a common  
77 statistical ensemble. We show that this simple model generates statistics that  
78 quantitatively match those observed in experimental time series across wide-ranging  
79 microbiotas, allowing us to infer the macroscopic, ensemble-level parameters of resource  
80 competition that can recapitulate their observed dynamics. Our work provides a  
81 systematic connection between complex microbiotas and the coarse-grained resource  
82 competition underlying their dynamics, with broad importance for engineering  
83 communities relevant to human health and to agriculture.

## 84 Results

85

### 86 ***A coarse-grained consumer-resource model under fluctuating environments***

87 To determine whether environmental resource fluctuations alone could reproduce  
88 experimentally observed time series statistics, we considered a minimal consumer  
89 resource (CR) model in which  $N$  consumers compete for  $M$  resources via instantaneous  
90 growth dynamics described by

$$\begin{aligned} 91 \quad \frac{dX_i}{dt} &= X_i \sum_{j=1}^M R_{ij} Y_j, \\ 92 \quad \frac{dY_j}{dt} &= -Y_j \sum_{i=1}^N R_{ij} X_i. \quad (1) \end{aligned}$$

93 Here,  $X_i$  denotes the abundance of consumer  $i$ ,  $Y_j$  the amount of resource  $j$ , and  $R_{ij}$  the  
94 consumption rate of resource  $j$  by consumer  $i$ . The resources in this model are defined  
95 at a coarse-grained level, such that individual resources could represent effective groups  
96 of metabolites or niches. We assumed that the resource consumption rates  $R_{ij}$  were  
97 independent of the external environment and constant over time, thereby specifying the  
98 intrinsic ecological properties of the community with a collection of  $N \times M$  parameters.

99

100 To simplify this vast parameter space, we conjectured that the macroecological features  
101 of our experimental time series might be captured by a typical community consumption  
102 profile drawn from a larger statistical ensemble. Specifically, we considered an ensemble  
103 in which each  $R_{ij}$  was randomly selected from a uniform distribution between 0 and  $R_{\max}$ .  
104 To model the sparsity of resource competition within the community, each  $R_{ij}$  was set to  
105 zero with probability  $S$  (Fig. 1A). This ensemble approach allows us to represent arbitrarily  
106 large communities with a small number of global parameters,  $S$  and  $R_{\max}$ . Crucially, our  
107 ensemble assumes that there are no direct tradeoffs in resource use<sup>4,5,19</sup>, such that the  
108 maximum growth rate of each individual is strongly correlated to the total number of  
109 resources it can consume.

110

111 We simulated the resource competition dynamics in Eq. 1 using a serial dilution scheme<sup>20</sup>  
112 to mimic the punctuated turnover of gut microbiotas due to multiple feedings and  
113 defecations between sampling times. During a sampling interval  $T$ , each dilution cycle  
114 was seeded with an initial amount of each resource,  $Y_{j,0}(T)$ , and Eq. 1 was simulated until  
115 all resources were depleted ( $dY_j/dt = 0$  for all  $j$ ). The entire community was then diluted  
116 by a factor  $D$  and resources were replenished to their initial amounts  $Y_{j,0}(T)$  (Fig. 1B). To  
117 mimic the effects of internal or external reservoirs of species that could potentially  
118 compete for local resources<sup>21</sup>, we initialized the first dilution cycle of each sampling  
119 interval by assuming that  $N$  consumers were present at equal abundance. Additional  
120 dilution cycles were then performed until an approximate ecological steady state was  
121 reached (Fig. 1B, Methods). Consumer abundances at sampling time  $T$  were defined by  
122 this approximate ecological steady state. For most of the relevant parameter regimes we  
123 considered, this approximate steady state was reached within a reasonable number of  
124 generations (5-6 dilutions or  $\sim 40$  generations for  $D = 200$ ). Our results did not depend on  
125 the precise composition of the reservoir (Fig. S1A), although they can strongly depend on  
126 the existence and the relative size of a reservoir (Fig. S1B). We discuss the implications  
127 of this finding in the Discussion.

128  
129 Under the assumptions of this model, any temporal variation in consumer abundances  
130 must arise through external fluctuations in the initial resource levels  $Y_{j,0}(T)$ . To model  
131 these fluctuations, we assumed that the initial resource levels undergo a biased random  
132 walk around their average values  $\bar{Y}_j$ :

$$133 \quad Y_{j,0}(T) = |Y_{j,0}(T-1) - k(Y_{j,0}(T-1) - \bar{Y}_j) + \sigma \bar{Y}_j \xi_j(T)|,$$

134 where  $\xi_j(T)$  is a normally distributed random variable with zero mean and unit variance,  
135  $\sigma$  determines the magnitude of resource fluctuations, and  $k$  is the strength of a restoring  
136 force that ensures the same resource environment on average over time (Fig. 1A). If  $k =$   
137  $0$ , there is no restoring force and hence  $Y_{j,0}(T)$  performs an unbiased random walk; if  $k =$   
138  $1$ ,  $Y_{j,0}(T)$  fluctuates about its set point  $\bar{Y}_j$  independent of its value at previous sampling  
139 time. As above, we used an ensemble approach to model the set points  $\bar{Y}_j$ , and assumed  
140 that each was independently drawn from a uniform distribution between  $0$  and  $Y_{\max}$ . This

141 model yields a sequence of fluctuating resource amounts  $Y_{j,0}(T)$ , and a corresponding  
142 time series of consumer relative abundances  $x_i(T) = X_i(T) / \sum_k X_k(T)$  (Fig. 1C).

143  
144 The statistical properties of these time series are primarily determined by 5 global  
145 parameters: the total number of consumers in the reservoir  $N$ , the number of resources  
146 in the environment  $M$ , the sparsity of the resource consumption matrix  $S$ , and the resource  
147 fluctuation parameters  $\sigma$  and  $k$ . The absolute magnitudes of  $R_{\max}$  and  $Y_{\max}$  are not  
148 important for our purposes since they do not affect the predictions of consumer relative  
149 abundances. The precise value of the dilution factor and steady-state threshold did not  
150 substantially affect time series statistics, as long as a realistic number of generations  
151 elapsed between sampling times (Fig. S2). We extracted  $N$  from experimental data as  
152 the number of consumers that were present for at least one sampling time point, leaving  
153 only 4 free ensemble-level parameters. Previous studies have shown that the metabolic  
154 capabilities of bacterial species are more similar within families than between them<sup>6,22,23</sup>,  
155 thus we assumed that each consumer grouping  $i$  within our model represents a  
156 taxonomic family, and combined abundances of empirical operational taxonomic units  
157 (OTUs) or amplicon sequencing variants<sup>24</sup> (ASVs) at the family level for analysis  
158 (Methods). Given the typical limits of detection of 16S amplicon sequencing data sets,  
159 consumers whose relative abundance was  $< 10^{-4}$  were set to zero abundance in both  
160 simulations and experimental data, and the abundances of the remaining consumers  
161 were normalized to a sum of one.

162  
163 An example simulation using the parameters  $(N, M, S, \sigma, k) = (50, 30, 0.1, 0.2, 0.8)$  is  
164 shown in Fig. 1. This particular set of parameters produces relative abundance time series  
165 with highly similar statistical behaviors as in experiments involving daily sampling of  
166 human stool (Fig. 1D). Given these successes, we next systematically analyze the time  
167 series statistics generated by our model across parameter space, and compare against  
168 experimental behaviors to estimate model parameters for wide-ranging microbiotas.

169

170 ***Model reproduces the statistics of human gut microbiota time series***

171 To test whether our model can recapitulate all major features of experimental time series,  
172 we first focused on a data set of daily sampling of the gut microbiota from a human  
173 subject<sup>9</sup> (Fig. 2). These data were previously shown<sup>11</sup> to exhibit several distinctive  
174 statistical behaviors: 1) the variance  $\sigma_{x_i}^2$  of family  $i$  over the sampling period scaled as a  
175 power law with its mean  $\langle x_i \rangle$  (Fig. 2B,F); 2) the  $\log_{10}$ (abundance change)  $\Delta l_i(T) =$   
176  $\log_{10}(x_i(T+1)/x_i(T))$ , pooled over all families and across all sampling times, was well  
177 fit by an exponential distribution with standard deviation  $\sigma_{\Delta l}$  (Fig. 2B,G); and 3) the  
178 distributions of residence times  $t_{\text{res}}$  and return times  $t_{\text{ret}}$  (the durations of sustained  
179 presence and absence, respectively) pooled over all families were well fit by power laws  
180 with an exponential cutoff (Fig. 2D,K). Through an exhaustive search of parameter space,  
181 we found that our model could reproduce all of these behaviors (Fig. 2F,G,K). In addition,  
182 several other important statistics were reproduced without any additional fitting: 1) the  
183 distribution of richness  $\alpha(T)$ , the number of consumers present at sampling time  $T$  (Fig.  
184 2A,E), 2) the distribution of the restoring slopes  $s_i$  of the linear regression of  $\Delta l_i(T)$   
185 against  $l_i(T) \equiv \log_{10}(x_i(T))$  across all  $T$  (Fig. 2C,H), 3) the distribution of prevalences  $p_i$ ,  
186 the fraction of sampling times for which family  $i$  is present (Fig. 2A,I); 4) the relationship  
187 between  $p_i$  and  $\langle x_i \rangle$  (Fig. 2J); and 5) the rank distribution of mean abundance  $\langle x_i \rangle$  (Fig.  
188 2L). Therefore, with only 4 parameters, our model was able to simultaneously capture at  
189 least 8 statistical behaviors in a microbiota time series, each of which may capture  
190 biologically relevant features of the community.

### 191 192 **Systematic characterization of the effects of consumer-resource dynamics on time** 193 **series statistics**

194 Since our model can reproduce the observed statistics in gut microbiota time series, we  
195 sought to determine how these statistics would respond to changes in model parameters,  
196 and thus how experimental measurements constrain the ensemble parameters across  
197 various data sets. To do so, we simulated our model across all relevant regions of  
198 parameter space.  $S$  and  $k$  were varied across their entire ranges, while  $M$  and  $\sigma$  were  
199 varied across relevant regions outside of which the model clearly disagreed with the  
200 observed data. For each set of parameters, each time series statistic was averaged  
201 across random instances of  $R_{ij}$  and  $Y_{j,0}(T)$  drawn from the same statistical ensemble. For



202 each statistic  $z$ , its global susceptibility  $C(z, w)$  to parameter  $w$  was calculated as the  
203 change in  $z$  when  $w$  is varied, averaged over all other parameters and normalized by the  
204 standard deviation of  $z$  across the entire parameter space. Due to the normalization,  
205  $C(z, w)$  varies approximately between -3 and 3, where a magnitude close to 3 indicates  
206 that almost all the variance of  $z$  is due to changing  $w$ .

207  
208 By clustering and ranking susceptibilities, we identified four statistics with  $|C(z, w)| > 2$   
209 that were largely determined by one of each of the four model parameters (Fig. 3, S3):  
210 mean richness  $\langle \alpha \rangle$ , the power-law exponent  $\beta$  of  $\sigma_{x_i}^2$  versus  $\langle x_i \rangle$ , the standard deviation in  
211  $\log_{10}$ (abundance change)  $\sigma_{\Delta l}$ , and the mean restoring slope  $\langle s \rangle$  were almost exclusively  
212 susceptible to variations in  $M$ ,  $S$ ,  $\sigma$ , and  $k$ , respectively. Similar results were also obtained  
213 for local versions of the susceptibility, in which individual parameters were varied around  
214 the best fit values for the human gut microbiota in Fig. 2 (Fig. S4). Susceptibilities broadly  
215 illustrate how various time series statistics are affected by coarse-grained parameters of  
216 resource competition; we further investigate some specific examples in the next section.

217  
218 The exclusive susceptibilities of these four statistics suggest that they can serve as  
219 informative metrics for estimating model parameters. Therefore, we estimated model  
220 parameters by minimizing the sum of errors between model predictions and experimental  
221 measurements of these four statistics, and obtained estimation bounds by determining  
222 parameter variations that would increase model error by 5% of the mean error across all  
223 parameter space. As we will show, the resulting bounds are small relative to the  
224 differences among distinct microbiotas, indicating that meaningful conclusions can be  
225 drawn from the best-fit values of the ensemble-level parameters of resource competition.  
226 In summary, the 4 model parameters were fit to 4 summary statistics, mean richness  $\langle \alpha \rangle$ ,  
227 variance-mean scaling exponent  $\beta$ , standard deviation of abundance change  $\sigma_{\Delta l}$ , and  
228 mean restoring slope  $\langle s \rangle$  (Fig. 2E-H, respectively). The shape of their corresponding  
229 distributions and scalings, as well as at least 4 other statistics, are all parameter-free  
230 predictions (Fig. 2I-L), providing support for our model.

231

232 ***Origins of distinctive statistical behaviors in species abundance time series***

233 To understand the mechanisms that underlie the susceptibilities of various time series  
234 statistics to model parameters, we investigated their origins within our model, focusing on  
235 how they constrain the parameters.

236  
237 The average richness  $\langle \alpha \rangle$  is a fundamental descriptor of community diversity. Within our  
238 model,  $\langle \alpha \rangle$  is largely determined by and increases with increasing resource number  $M$   
239 ( $C(\alpha, N/M) = -2.6$ ), as expected for CR dynamics. The sparsity of resource use  $S$   
240 impacts the power-law exponent  $\beta$  between  $\sigma_{x_i}^2$  and  $\langle x_i \rangle$  ( $C(\beta, S) = -2.0$ ). The effect of  $S$   
241 on  $\beta$  can be partially understood as follows. When sparsity is high ( $S \approx 1$ ), consumers  
242 consume distinct sets of resources with little competition from other consumers, and the  
243 variation in the number of utilized resources can be large relative to the average value  
244  $M(1 - S)$ . In this case, both  $\sigma_{x_i}^2$  and  $\langle x_i \rangle$  scale with the number of resources consumed,  
245 and hence  $\beta \approx 1$ . By contrast, when sparsity is low ( $S \approx 0$ ), all consumers consume all  
246 resources and hence the numbers of resources consumed are the same among  
247 consumers. To better understand this limit, we simulated a no-competition model in which  
248 all consumers consume distinct sets of the same number of resources. For large number  
249 of resources, these simulations predicted that  $\beta \approx 1.5$ , in agreement with our model for  
250  $S \approx 0$  (Fig. S5). Simulations of the no-competition model with varying numbers of  
251 resources consumed predicted values of  $\beta$  between 1 and 1.5 (Fig. S5), suggesting that  
252 the effect of  $S$  on  $\beta$  can be partially attributed to differences in the number of resources  
253 consumed across consumers. Together,  $\alpha$  and  $\beta$  constrain the parameters of resource  
254 competition  $M$  and  $S$ .

255  
256 The distribution of  $\Delta l$  describes the nature of abundance changes. As expected, the width  
257 of the distribution is largely determined by and increases with increasing  $\sigma$  ( $C(\sigma_{\Delta l}, \sigma) =$   
258  $2.6$ ). For the gut microbiota data set in Fig. 2, the shape of the distribution was well fit by  
259 an exponential. Within our model, the shape of the distribution aggregated across all  
260 consumers is determined by  $N/M$  and the sparsity  $S$ , emerging from the mixture of each  
261 consumer's individual distribution (Fig. S6). When  $N/M < 1$  and the sparsity  $S$  is low,  
262 individual distributions of  $\Delta l$  are well fit by normal distributions, and pool together to  
263 generate another normal distribution. When  $N/M < 1$  and sparsity  $S$  is high, individual

264 distributions remain normal, but can pool together to generate a non-normal distribution  
265 that is well fit by an exponential (see also Ref. <sup>25</sup>). By contrast, when  $N/M > 1$ , individual  
266 distributions can be well fit by an exponential, and can pool together to approximate  
267 another exponential. Simulations of the no-competition model considered above led to  
268 individual and aggregate distributions that were normal in all cases, indicating that  
269 resource competition is responsible for generating the non-normal distributions of  $\Delta l$  in  
270 our model (Fig. S5). Although it is challenging to discern the shape of individual  
271 distributions in most experimental data sets given the limited numbers of samples, the  
272 shape of the aggregate distribution of  $\Delta l$  informs the parameters of resource competition  
273  $M$  and  $S$ . In particular, an exponential distribution of  $\Delta l$  suggests either significant  
274 resource competition in the form of  $N > M$ , or substantial niche differentiation in the form  
275 of high  $S$ . Other statistics such as  $\beta$  can help to distinguish between these two regimes.

276  
277 The distribution of restoring slopes  $s_i$  describes the tendency with which consumers  
278 revert to their mean abundances following fluctuations. As expected, the mean  $\langle s \rangle$  is  
279 almost completely determined by  $k$ , which describes the autocorrelation in resource  
280 levels ( $-\langle s \rangle \approx k$  and  $C(\langle s \rangle, k) = -3.0$ ). Together, the distributions of  $\Delta l$  and  $s_i$  constrain  
281 the parameters of external fluctuations  $\sigma$  and  $k$ .

282  
283 Within our model, resource fluctuations can lead to the temporary “extinction” of certain  
284 species when they drop below our detectability threshold  $x_i(T) < 10^{-4}$ . The distributions  
285 of residence and return times,  $t_{\text{res}}$  and  $t_{\text{ret}}$ , reflect the probabilities of extinction as well as  
286 correlations between sampling times. For all parameter sets explored, these distributions  
287 can be well fit by power laws, with an exponential cutoff to account for finite sampling in  
288 time<sup>11</sup>. As expected, the power-law slopes  $\nu_{\text{res}}$  and  $\nu_{\text{ret}}$  decrease (become more negative)  
289 with increasing  $\sigma$  or  $k$ , since increasing external noise or decreasing correlations in time  
290 increases the probability of fluctuating between existence and extinction for each  
291 consumer, thereby decreasing  $\nu_{\text{res}}$  and  $\nu_{\text{ret}}$  for all consumers. By contrast,  $\nu_{\text{res}}$  and  $\nu_{\text{ret}}$   
292 change in opposite directions in response to variation in  $M$ . Increasing  $M$  leads to a larger  
293 number of highly prevalent consumers, thereby increasing the mean and broadening the  
294 distribution of  $t_{\text{res}}$  and decreasing the mean and narrowing the distribution of  $t_{\text{ret}}$ . Since

295 the 4 ensemble-level parameters are already fixed by other statistics, the distributions of  
296  $t_{\text{res}}$ ,  $t_{\text{ret}}$ , and  $p_i$  are parameter-free predictions of our model. In other words, a  
297 macroscopic characterization of the effective resource competition and resource  
298 fluctuations is sufficient to predict the statistics of “extinction” dynamics, as well as the  
299 abundance rank distribution and the relationship between consumer abundance and  
300 prevalence.

301  
302 Having clarified the origins of several important time series statistics, we next investigated  
303 how they depend on model assumptions. First, we considered a non-interacting null  
304 model in which consumer abundances were drawn from independent normal distributions  
305 whose means and variances were fitted directly from the data. Even with a large number  
306 of free parameters, this null model was unable to capture some of the time series statistics  
307 reproduced by our resource competition model above, such as the distributions of  
308 residence and return times (Fig. S7). We reasoned that the discrepancies between  
309 experimental data and the null model could be due to the lack of interspecies interactions.  
310 To test this hypothesis, we examined the pairwise correlations between the abundances  
311 of pairs of consumers across sampling times. The measured distribution of pairwise  
312 correlations is much broader than the prediction of the non-interacting model, which is  
313 sharply peaked about zero as expected (Fig. 4). By contrast, the distribution of  
314 correlations predicted by our resource competition model was in much closer agreement  
315 with the experimental data without any additional fitting parameters (Fig. 4). These  
316 findings suggest that competitive interactions among consumers are required to capture  
317 important details of community dynamics.

318  
319 Second, since the distributions of  $\Delta l$ ,  $t_{\text{res}}$ , and  $t_{\text{ret}}$  are dependent on correlations between  
320 sampling times, it was initially puzzling that their distributions in some data sets remained  
321 similar after shuffling sampling times, raising doubt as to what extent these statistics hold  
322 information about the underlying intrinsic dynamics<sup>26</sup>. Our results reconcile the apparent  
323 conundrum, since within our model richness  $\langle \alpha \rangle$  and Taylor’s law exponent  $\beta$  do not  
324 depend on correlations between sampling times and are also the statistics that are most  
325 informative about the intrinsic parameters  $M$  and  $S$  (Fig. 3). As a result, the shuffled time

326 series were well fit by our model, and yielded best fit values that were identical to those  
327 produced by the actual time series but with  $k = 1$ , as expected due to the absence of  
328 correlation across sampling times (Fig. S8). Moreover, we found that many microbiotas  
329 yielded best fit values of  $k$  close to 1, indicating low correlation across sampling times  
330 (Fig. 5). Taken together, our results demonstrate that although external fluctuations in  
331 resource levels are responsible for generating species abundance variations, the intrinsic  
332 properties of resource competition determine the resulting scaling exponents of the  
333 statistical behaviors.

334  
335 Lastly, grouping time series at coarser taxonomic levels yielded similar qualitative  
336 statistical behaviors, which were also reproduced by our model (Fig. S9). Interestingly,  
337 the best fit value of  $S$  was larger for coarser groupings, supporting the hypothesis that  
338 higher taxonomic groups have substantially differentiated metabolic capabilities.

339  
340 Taken together, our analyses demonstrate the complex relationships among time series  
341 statistics and highlight the unification of these statistics within our model using only a  
342 small number of biologically meaningful parameters.

### 343 344 ***Time series statistics distinguish wide-ranging microbiotas***

345 Having developed a simple method to estimate model parameters, we applied this  
346 method to time series of wide-ranging microbial communities. In addition to microbiotas  
347 from the human and mouse gut<sup>9,10,27</sup>, we examined communities from the human  
348 vagina<sup>28</sup>, human saliva<sup>10</sup>, and in and around rice roots<sup>29</sup>. Their time series statistics varied  
349 broadly in value (Fig. 5A). Nevertheless, our model successfully reproduced the  
350 experimental statistics across all communities (Fig. S10-S15), suggesting that simple  
351 resource competition models can capture many of the macroscopic features of these  
352 microbiotas.

353  
354 The best fit parameters suggest that the effective resource competition dynamics occur  
355 in distinct regimes (Fig. 5B). Human gut microbiotas were best described by  $N > M$ ,  
356 suggesting that there are more species in the reservoir than resources in the environment,

357 by contrast to mouse gut microbiotas that were best described by  $N < M$ . In terms of  
358 resource niche overlaps, human gut microbiotas were best fit with sparsity  $S < 0.3$ , while  
359 mouse gut microbiotas were best fit with  $S > 0.3$ , indicating that on average, pairs of  
360 bacterial families are more metabolically distinct in the mouse versus the human gut.

361  
362 Unlike gut microbiotas, a human saliva microbiota yielded best fit parameters  $N \approx M$  and  
363  $S \approx 0.8$ , suggesting that this community has access to abundant resources and that each  
364 effective resource is competed for by a small fraction of the extant bacterial families. All  
365 vaginal microbiotas were best fit with  $S < 0.1$ , suggesting intense resource competition.  
366 Interestingly, although vaginal microbiotas can be classified into several types based on  
367 the dominating species<sup>28</sup>, time series statistics among the different types (and hence their  
368 best fit parameters) were virtually indistinguishable (Fig. 5B, S12).

369  
370 Like vaginal microbiotas, microbial communities residing in the bulk soil around rice roots  
371 and in the associated rhizoplane and rhizosphere were well described by  $S < 0.1$ . By  
372 contrast, the community in the associated endosphere was best described by  $S \approx 0.6$ ,  
373 suggesting that resource competition is less fierce within plant roots than around them.  
374 However, we caution that the stable point of these plant-associated communities shifts  
375 over time<sup>29</sup>, which may affect time series statistics outside the scope of our model.

376  
377 In addition, inferences about the nature of environmental fluctuations can be made from  
378 the best fit values of  $\sigma$  and  $k$  (Fig. 5B). Across all but two vaginal microbiota data sets,  
379  $\sigma \approx 0.2 \pm 0.1$ , indicating that changes in resource levels smaller than this magnitude will  
380 generate abundance changes that look like typical fluctuations. The best fit values of  $k$   
381 varied between 0.5 and 1 across data sets, suggesting that the dynamics of microbial  
382 communities occur faster than or comparable to the typical sampling frequency of  
383 longitudinal studies.

384  
385 Inferences about intrinsic parameters of resource competition and external parameters of  
386 environmental fluctuations were also consistent with expectations for *in vitro* passaging  
387 of a complex community derived from humanized mice<sup>30</sup>. The resulting time series

388 statistics were best fit by the smallest value of  $\sigma$  among the data sets studied, indicating  
389 that the *in vitro* environment has low noise across sampling times; the nonzero  $\sigma$   
390 presumably arises from technical variations that result in effective noise in resource  
391 levels. The best fit value of  $M$  was larger than the reservoir size  $N$ , suggesting that there  
392 are many distinct resources in the complex medium used for passaging and consistent  
393 with the ability of more diverse inocula to support more diverse *in vitro* communities<sup>30</sup>.  
394 The consistency of these results further supports the mechanistic picture provided by our  
395 modeling framework. Taken together, our model predicts ensemble-level parameters of  
396 resource competition and external parameters of environmental fluctuations for several  
397 widely studied microbial communities that can inform future mechanistic studies.



## 398 **Discussion**

399 Here, we presented a coarse-grained CR model that generates species abundance time  
400 series from fluctuating environmental resources. We demonstrated that this model  
401 reproduces several important statistical behaviors, and how these observations constrain  
402 the parameters of resource competition within the model. Moreover, we successfully fitted  
403 the model to wide-ranging microbiotas, which allowed us to draw conclusions about their  
404 parameters of effective resource competition. In sum, our work provides a framework that  
405 unifies a plethora of time series statistics and exploits them to learn about the underlying  
406 community dynamics.

407  
408 An important and novel property of our model is its ability to reproduce many statistical  
409 behaviors across wide-ranging data sets with a minimal number of effective parameters.  
410 To what extent these effective parameters can be interpreted mechanistically should be  
411 an exciting avenue of future investigation. Although by no means exhaustive, our  
412 framework nevertheless addresses several pertinent questions regarding construction of  
413 useful models of microbiota dynamics. The success of our model in reproducing  
414 experimental time series statistics is consistent with bioinformatics-guided analyses of  
415 complex communities demonstrating that metabolic capability is a major determinant of  
416 community composition<sup>22,23</sup>. Our results also suggest that the contributions of a persistent  
417 reservoir of species are important for the dynamics of wide-ranging microbiotas<sup>21</sup>. Within  
418 our model, the lack of a reservoir renders poor consumers unable to recover to meaningful  
419 abundance within a sampling time even when resource fluctuations are in their favor,  
420 thereby distorting time series statistics. Further experimental work is required to ascertain  
421 the amount of growth and change that occurs during sampling time scales.

422  
423 In terms of intrinsic metabolic properties, our results provide a baseline expectation for  
424 the effective number of resources or available niches in the wide-ranging systems  
425 examined here, and to what extent they are competed for by extant consumers. In terms  
426 of environmental properties, our results provide a baseline expectation to help distinguish  
427 between typical fluctuations and large perturbations in resources. These expectations can  
428 aid in the engineering of complex microbiotas.



429

430 In general, our work demonstrates that it is feasible to reproduce time series statistics  
431 using consumer-resource models of microbiota dynamics, thereby generating  
432 mechanistic hypotheses for further investigation. In future work, more detailed  
433 hypotheses can be generated by investigating how time series statistics are affected by  
434 modifications to baseline CR dynamics, such as the incorporation of metabolic cross-  
435 feeding<sup>6,31</sup>, functional differentiation from genomic analysis<sup>32-34</sup>, and physical variables  
436 such as pH<sup>35,36</sup>, temperature<sup>37</sup>, and osmolality<sup>38</sup>. In addition, recent studies have shown  
437 that evolution can substantially affect the dynamics of human gut microbiotas<sup>39-41</sup>. It will  
438 therefore be illuminating to incorporate evolutionary dynamics into CR models under  
439 fluctuating environments<sup>19</sup>. Such extended models can then be applied to probe the  
440 underlying mechanisms in microbiotas with urgent applications, including those in marine  
441 environments, wastewater treatment plants, and the guts of insect pests and livestock.

## 442 **Methods**

443

### 444 ***Simulations of a CR model with fluctuating resource amounts***

445 Under a serial dilution scheme, an ecological steady state is reached when the dynamics  
446 in subsequent passages are identical, which is the case when all consumers are either  
447 extinct or have a growth ratio (the ratio of a consumer's final and initial abundances within  
448 one passage) equal to the dilution factor  $D$ . Due to the slow path to extinction of some  
449 consumers, reaching an exact ecological steady state can require hundreds of passages,  
450 presumably more than realistically occurs between sampling times in the data sets  
451 examined here. We assumed instead that between sampling times an ecological steady  
452 state is only approximately reached, defined as the growth ratios of all species changing  
453 by less than a threshold fraction of  $D$  between subsequent passages. Throughout this  
454 study,  $D$  was set to 200 and the steady state threshold was 5%, under which a steady  
455 state was approximately reached in about 5 dilutions (Fig. 1B). In this manner, our model  
456 assigns a well-defined state of consumer abundances to each resource environment  
457 while ensuring that only a reasonable amount of change occurs between sampling times.  
458 Note that in human gut microbiotas, abundances can change by more than 1,000 fold  
459 between daily samplings, indicating that at least 10 generations elapsed between  
460 sampling times (Fig. 2B). The precise value of  $D$  did not affect time series statistics, and  
461 steady state thresholds between 1% and 10% generated similar time series statistics (Fig.  
462 S2). We therefore expect our results to hold regardless of the precise values of these two  
463 parameters. Simulations were carried out in MATLAB, and all codes are freely available  
464 online at [https://bitbucket.org/kchuanglab/consumer-resource-model-for-microbiota-  
465 fluctuations/](https://bitbucket.org/kchuanglab/consumer-resource-model-for-microbiota-fluctuations/).

466

### 467 ***Analysis of 16S amplicon sequencing data***

468 Raw 16S sequencing data from Refs. <sup>10,28</sup> were downloaded from SRA, and ASVs were  
469 extracted using DADA2<sup>24</sup> with default parameters. OTUs or ASVs from other studies were  
470 downloaded and analyzed in their available form.

471 **Acknowledgements**

472 We thank members of the Huang lab and Lisa Maier, Rui Fang, Jie Lin, and Felix Wong  
473 for helpful discussions. We thank Stephanie Song and Nicholas Chia for sharing  
474 metadata. This work was funded by a Stanford School of Medicine Dean's Postdoctoral  
475 Fellowship (to P.H.), a Stanford Terman Fellowship (to B.H.G.), and NIH Awards R01  
476 AI147023 and RM1 GM135102 (to K.C.H.). K.C.H. is a Chan Zuckerberg Biohub  
477 Investigator.

478 **Figure Legends**

479

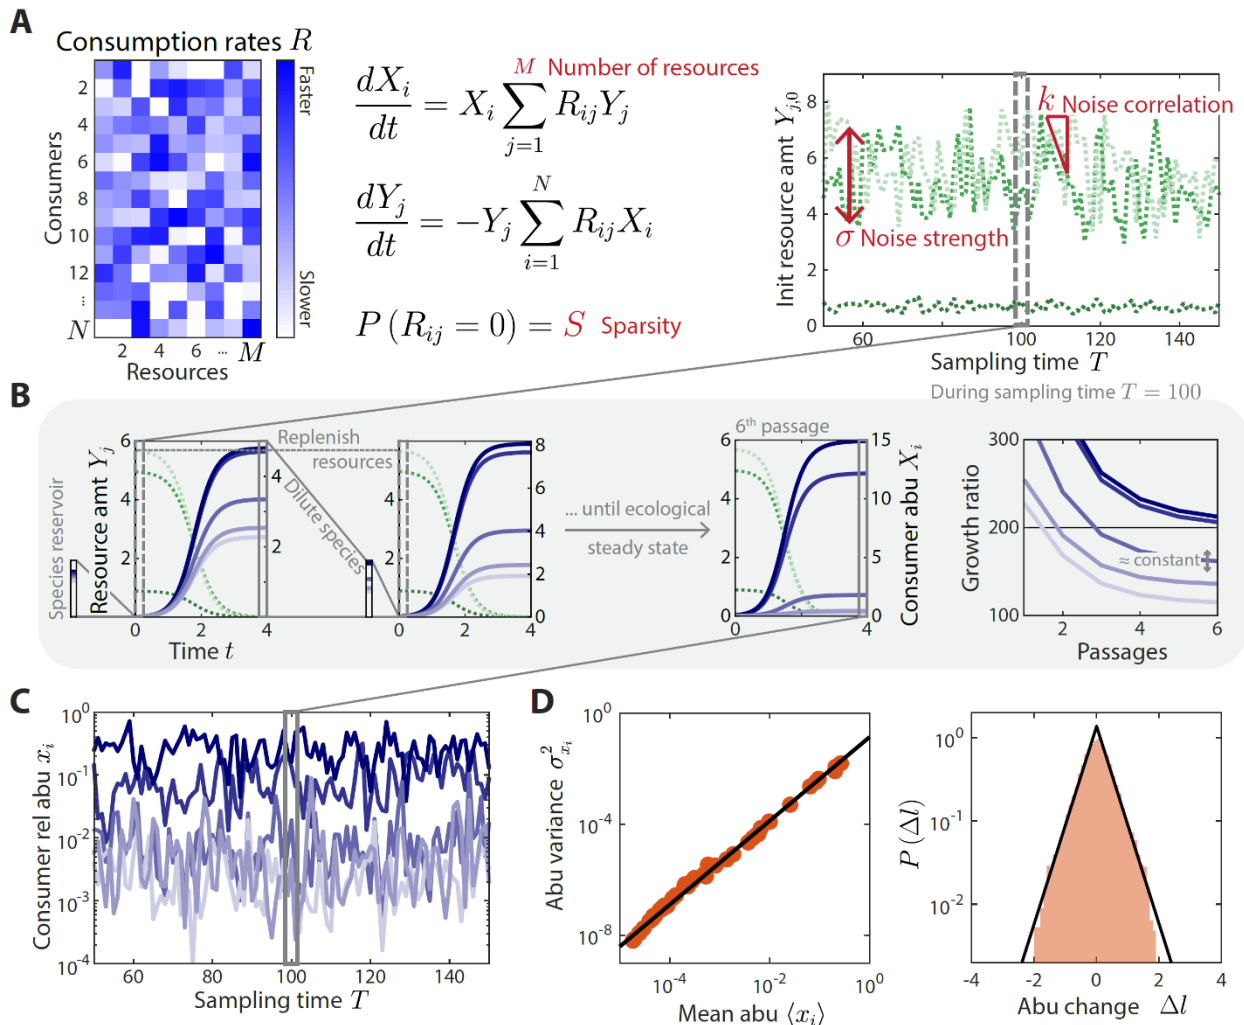

480

481 **Figure 1: A coarse-grained consumer-resource model with fluctuating resource**  
 482 **amounts.**

483 A) In the consumer-resource model,  $X_i$  denotes the abundance of consumer  $i$  and  $Y_j$   
 484 denotes the amount of coarse-grained resource  $j$ . The dynamics of the model are  
 485 specified by consumption rates  $R_{ij}$  for  $N$  consumers and  $M$  resources.  $R_{ij}$  is  
 486 drawn from a uniform distribution, and each  $R_{ij}$  is set to zero with probability  $S$ , the  
 487 sparsity of competition. The initial resource amount  $Y_{j,0}(T)$  at each  
 488 sampling time  $T$  fluctuates with noise strength  $\sigma$  and restoring force  $k$ .  $N$  is  
 489 estimated from each data set, and the 4 free ensemble-level parameters are  
 490 highlighted in red.

- 491 B) Shown are the dynamics of the model within one sampling time ( $T = 100$ , dashed  
492 gray box) for a subset of consumers and resources in a typical simulation. At each  
493 sampling time  $T$ , the model was simulated under a serial dilution scheme in which  
494 consumers (solid blue lines) grew until all resources (dotted green lines) were  
495 depleted, after which all consumer abundances were diluted by a fixed factor  $D =$   
496  $200$  and resource amounts were replenished to  $Y_0(T)$ . Each sampling time was  
497 initiated from an external reservoir of consumers, with all consumers present at  
498 equal abundance. Dilutions were repeated until an approximate ecological steady  
499 state was reached in which the ratios of final to initial abundances of all consumers  
500 changed by less than 5% of  $D$  between subsequent dilutions (Methods). The  
501 relative abundances at sampling time  $T$  were obtained from the final species  
502 abundances at steady state.
- 503 C) The model maps a set of fluctuating resource amounts  $Y_{j,0}(T)$  to a time series of  
504 species relative abundances  $x_i(T)$  that can be compared to experimental  
505 measurements.
- 506 D) The simulated time series in (C) exhibits statistical behaviors that reproduce those  
507 found in experiments, including a power-law scaling between the abundance  
508 variance and mean over time of each species (left) and an approximately  
509 exponential distribution of abundance changes (right). Black lines denote the best  
510 linear fit (left) and the best fit exponential distribution (right).
- 511 The example simulation shown in (A-D) was generated with  $(N, M, S, \sigma, k) =$   
512  $(50, 30, 0.1, 0.2, 0.8)$ .

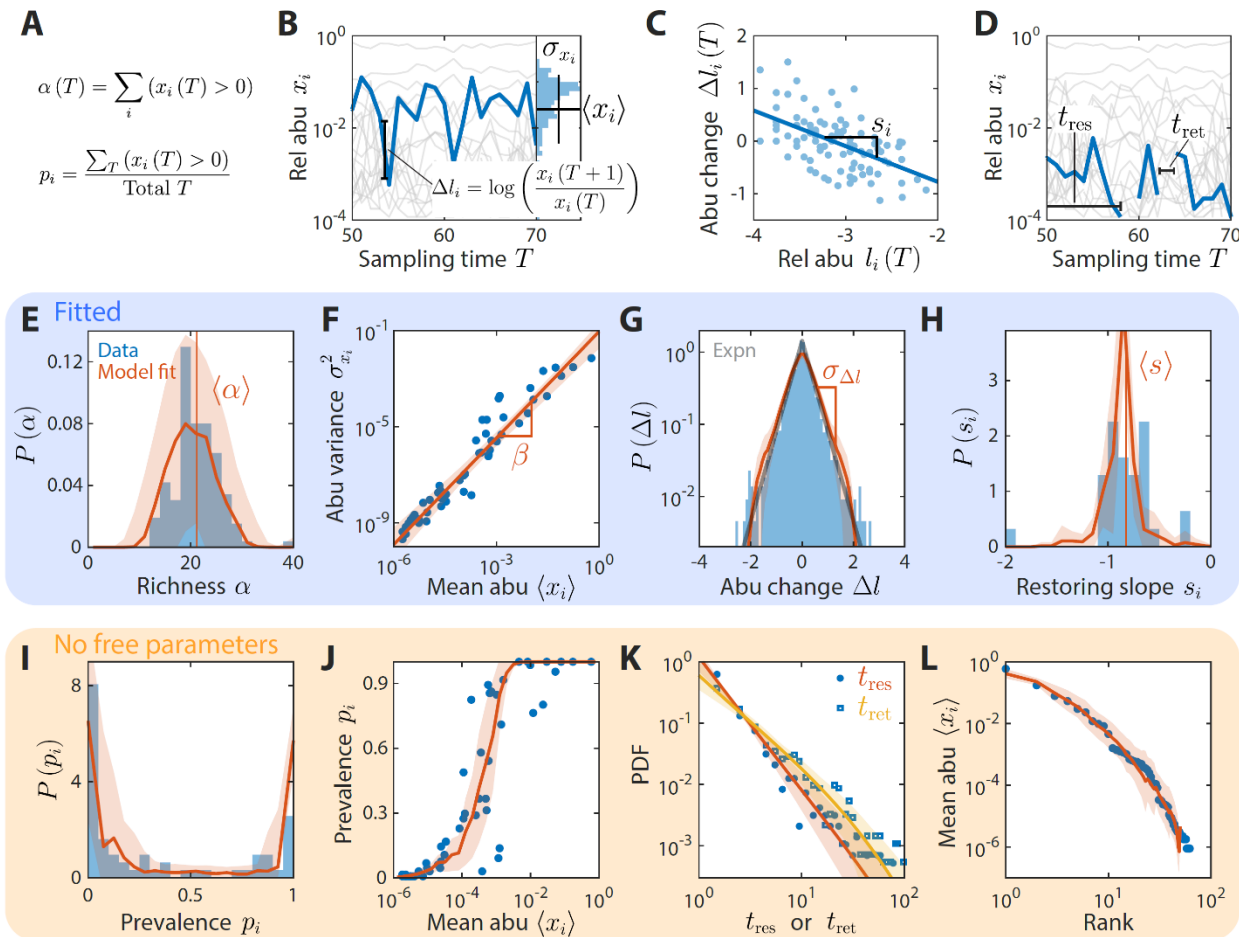

513

514 **Figure 2: A coarse-grained consumer-resource model with fluctuating resource**  
 515 **amounts reproduces experimentally observed statistics in the abundance time**  
 516 **series from a daily time series of a human gut microbiota.**

517 In all panels, blue points and bars denote experimental data analyzed and aggregated at  
 518 the family level<sup>9</sup>. Red lines and shading denote best fit model predictions as the mean  
 519 and standard deviation, respectively, across 20 random instances of the best fit  
 520 ensemble-level parameters,  $(N, M, S, \sigma, k) = (50, 30, 0.1, 0.2, 0.8)$ .

521 A-D) Illustrations of various time series statistics in (E-L).

522 E) The distribution of richness  $\alpha$ , the number of consumers present at a sampling  
 523 time (A), and its mean  $\langle \alpha \rangle$  are well fit by the model.

524 F) The variance  $\sigma_{x_i}^2$  and mean  $\langle x_i \rangle$  over time (B) of each family's abundance scale as  
 525 a power law with exponent  $\beta$ . Here,  $\beta = 1.48$  in experimental data and in  
 526 simulations.

527 G) The distribution of  $\log_{10}$ (abundance change)  $\Delta l$  (B) across all families is well fit by  
528 an exponential with standard deviation  $\sigma_{\Delta l}$ . The gray line denotes the best fit  
529 exponential distribution, and is largely overlapping with the model prediction in red.

530 H) The distribution of restoring slopes  $s_i$ , defined based on the linear regression  
531 between the abundance change and the relative abundance for a species across  
532 time (C), is tightly distributed around a mean  $\langle s \rangle$  that reflects the environmental  
533 restoring force.

534 Best fit values of model parameters were determined by minimizing errors in  $\langle \alpha \rangle$ ,  $\beta$ ,  
535  $\sigma_{\Delta l}$ , and  $\langle s \rangle$  (E-H, respectively). Using these values, our model also reproduced the  
536 distribution of prevalences (fraction of sampling times in which a consumer is present,  
537 D) (I), the relationship between prevalence and mean abundance (J), the distributions  
538 of residence and return times (durations of sustained presence or absence,  
539 respectively as illustrated in (D)) (K), and the rank distribution of abundances (L).

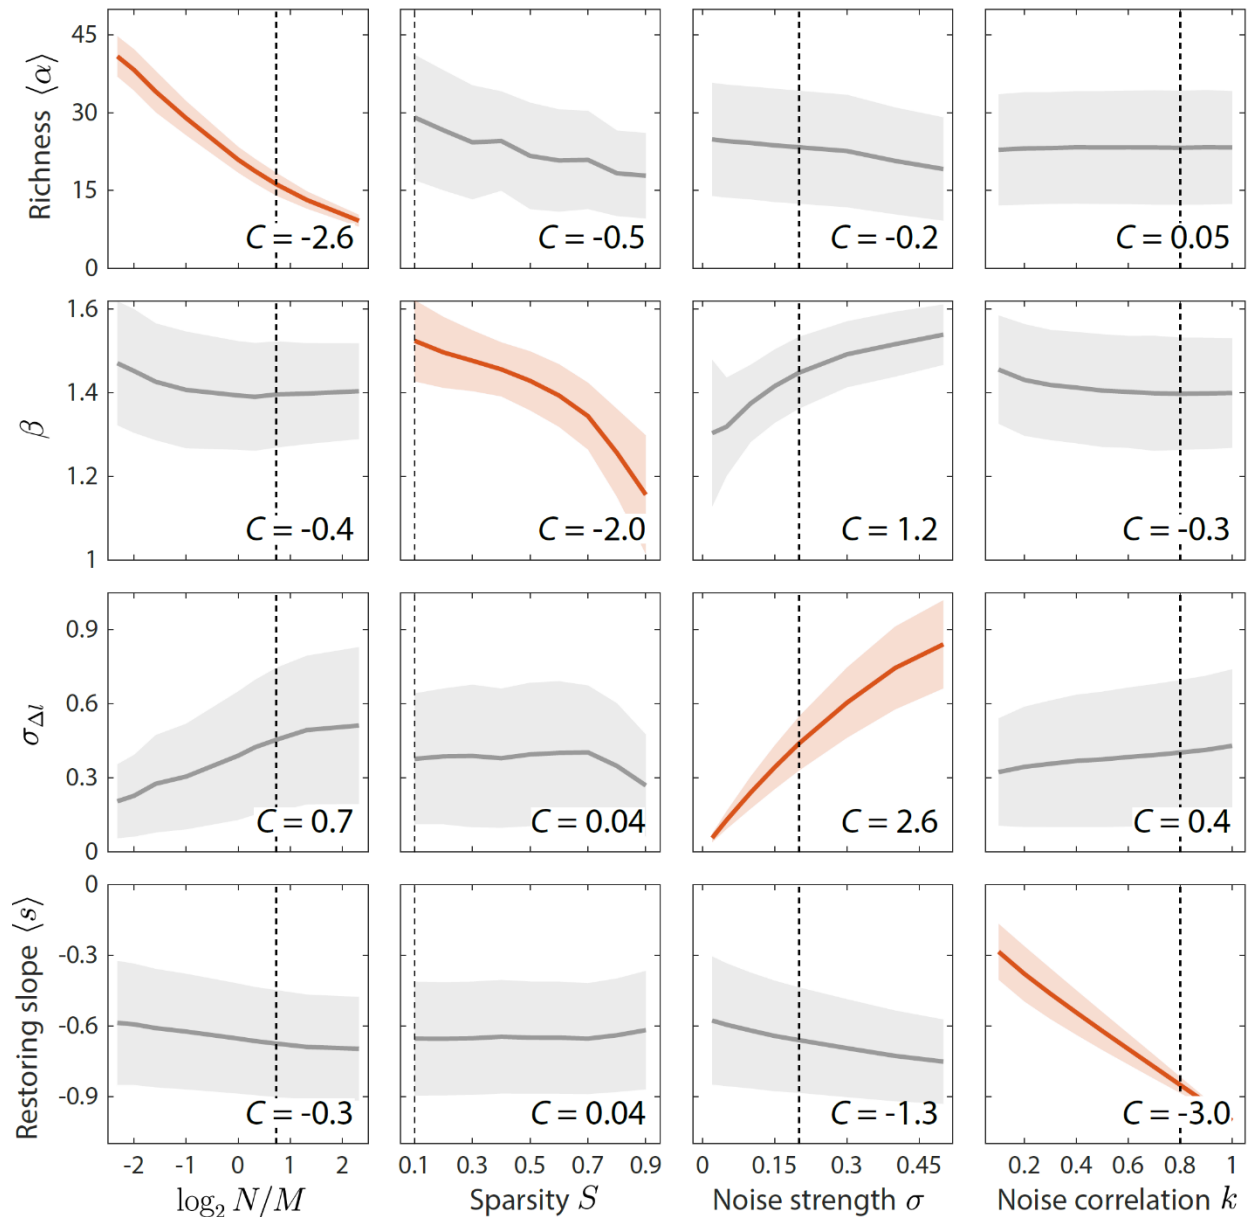

540

541 **Figure 1: Macroscopic parameters of resource competition affect time series**  
 542 **statistics in distinct manners.**

543 Shown are the changes in time series statistics (y-axis) in response to changes in model  
 544 parameters (x-axis) for a comprehensive search across relevant regions of parameter  
 545 space. Lines and shading show the mean and standard deviation of a statistic at the given  
 546 parameter value across variations in all other parameters. Panels are highlighted in red  
 547 when the corresponding susceptibility  $|C(z, w) > 2|$ , indicating that statistic  $z$  is strongly  
 548 affected by parameter  $w$  regardless of the values of other parameters. Dashed lines  
 549 highlight best fit parameter values to the experimental data in Fig. 2. Simulations were



550 carried out for  $N = 50$  across  $M \in [10, 20, 30, 40, 50, 100, 150, 200, 250]$ ,  $S \in [0.1, 0.9]$  in  
551 0.1 increments,  $\sigma \in [0.05, 0.5]$  in 0.05 increments, and  $k \in [0.1, 1]$  in 0.1 increments.

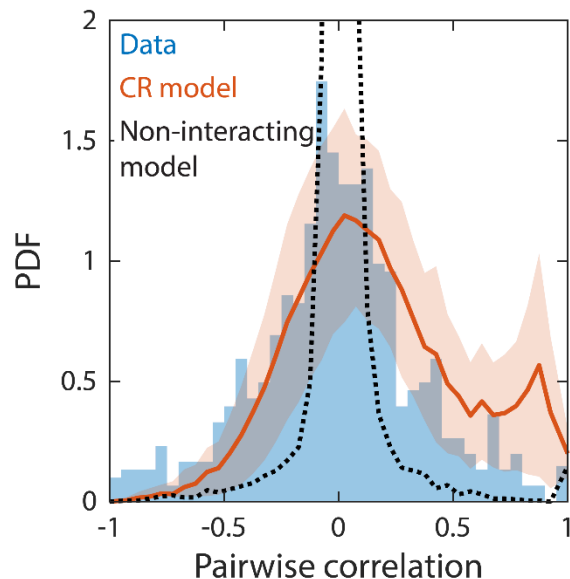

552

553 **Figure 4: Correlations between abundances of consumer pairs were captured by**  
554 **the consumer-resource model, but not by a non-interacting null model.**

555 Shown in blue is the distribution of correlations between the abundances across sampling  
556 times of all consumer pairs for the experimental data in Fig. 2. Red line represents  
557 parameter-free model predictions as in Fig. 2, using the same best fit parameters; shading  
558 represents 1 standard deviation. Black dashed line shows predictions of a non-interacting  
559 null model in which consumer abundances were drawn from independent normal  
560 distributions whose mean and variance were extracted from data.

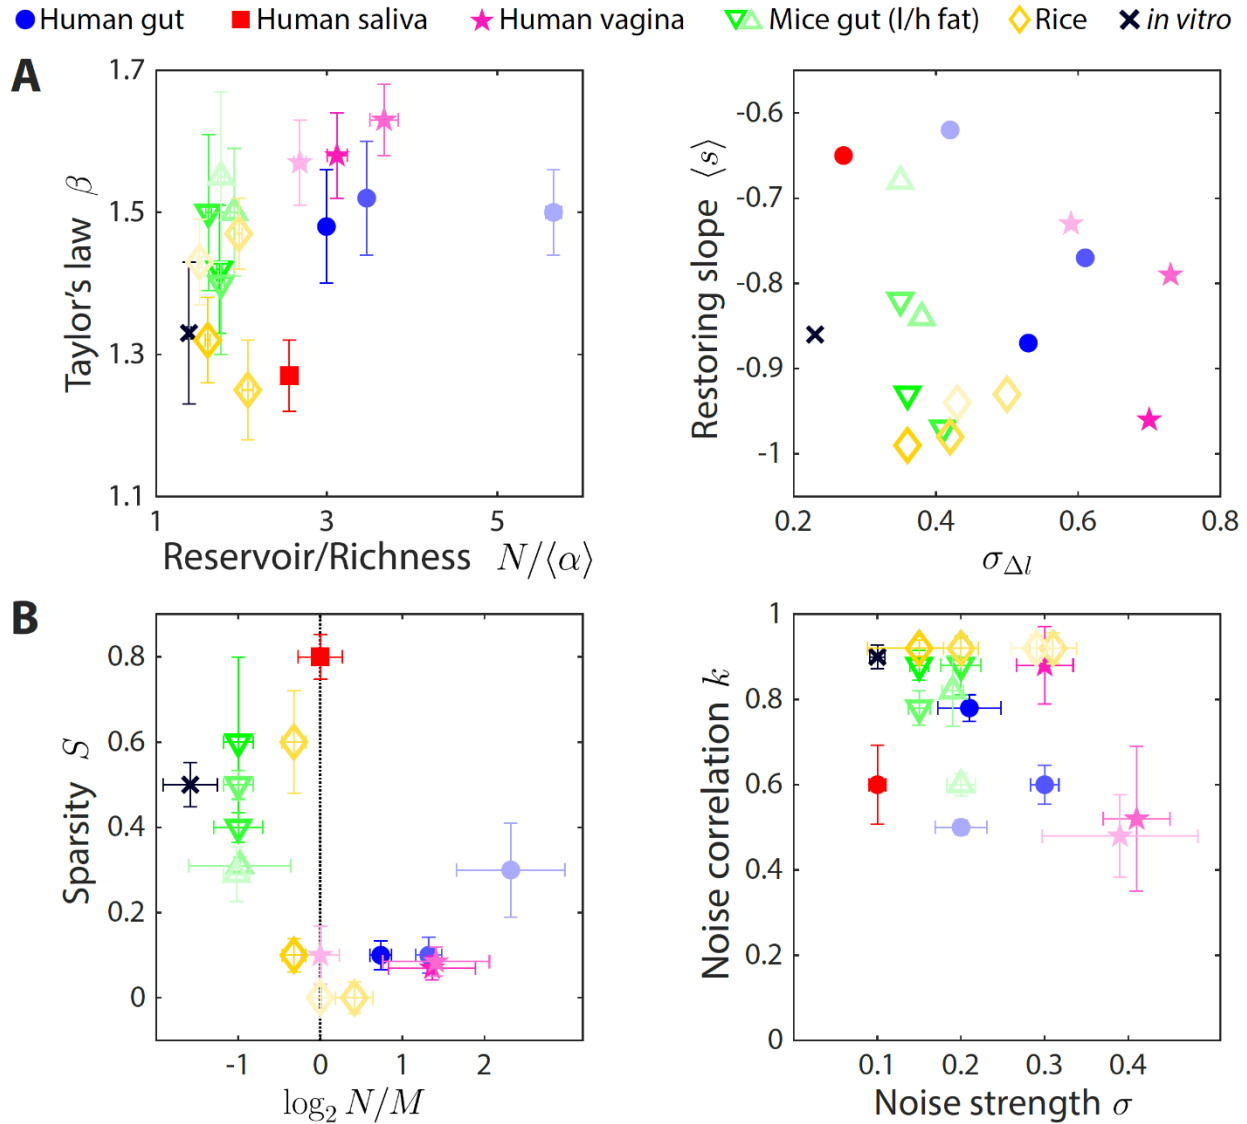

561

562 **Figure 5: The statistics of wide-ranging microbiotas were captured by the coarse-**  
 563 **grained consumer-resource model in different regimes of resource competition**  
 564 **and environmental fluctuations.**

565 Shown are time series statistics (A) and corresponding best fit model parameters (B) for  
 566 human microbiotas from stool<sup>9,10</sup> (blue circles), saliva<sup>10</sup> (red square), and the vagina<sup>28</sup>  
 567 (pink stars), gut microbiotas of mice under low-fat (green downward triangles) and high-  
 568 fat (green upward triangles) diets<sup>27</sup>, and plant microbiotas from the rice endosphere,  
 569 rhizosphere, rhizoplane, and bulk soil<sup>29</sup> (diamonds).

570 A) Microbiota origin generally dictates the scaling exponent  $\beta$  and the ratio between  
 571 the reservoir size  $N$  (number of observed families throughout the time series) and

572 the richness  $\langle\alpha\rangle$  (left), as well as the mean restoring slope  $\langle s\rangle$  and standard  
573 deviation of  $\log_{10}$ (abundance change) (right). Error bars denote 95% confidence  
574 intervals.

575 B) Microbiota origin generally dictates the best fit parameters of resource  
576 competition,  $N/M$  and  $S$  (left), and of environmental fluctuations,  $\sigma$  and  $k$  (right).  
577 Error bars denote variation in the parameter that would increase model error (as  
578 interpolated between parameter values scanned) by 5% of the mean error across  
579 all parameter values scanned.

580 **Supplemental figures**

581

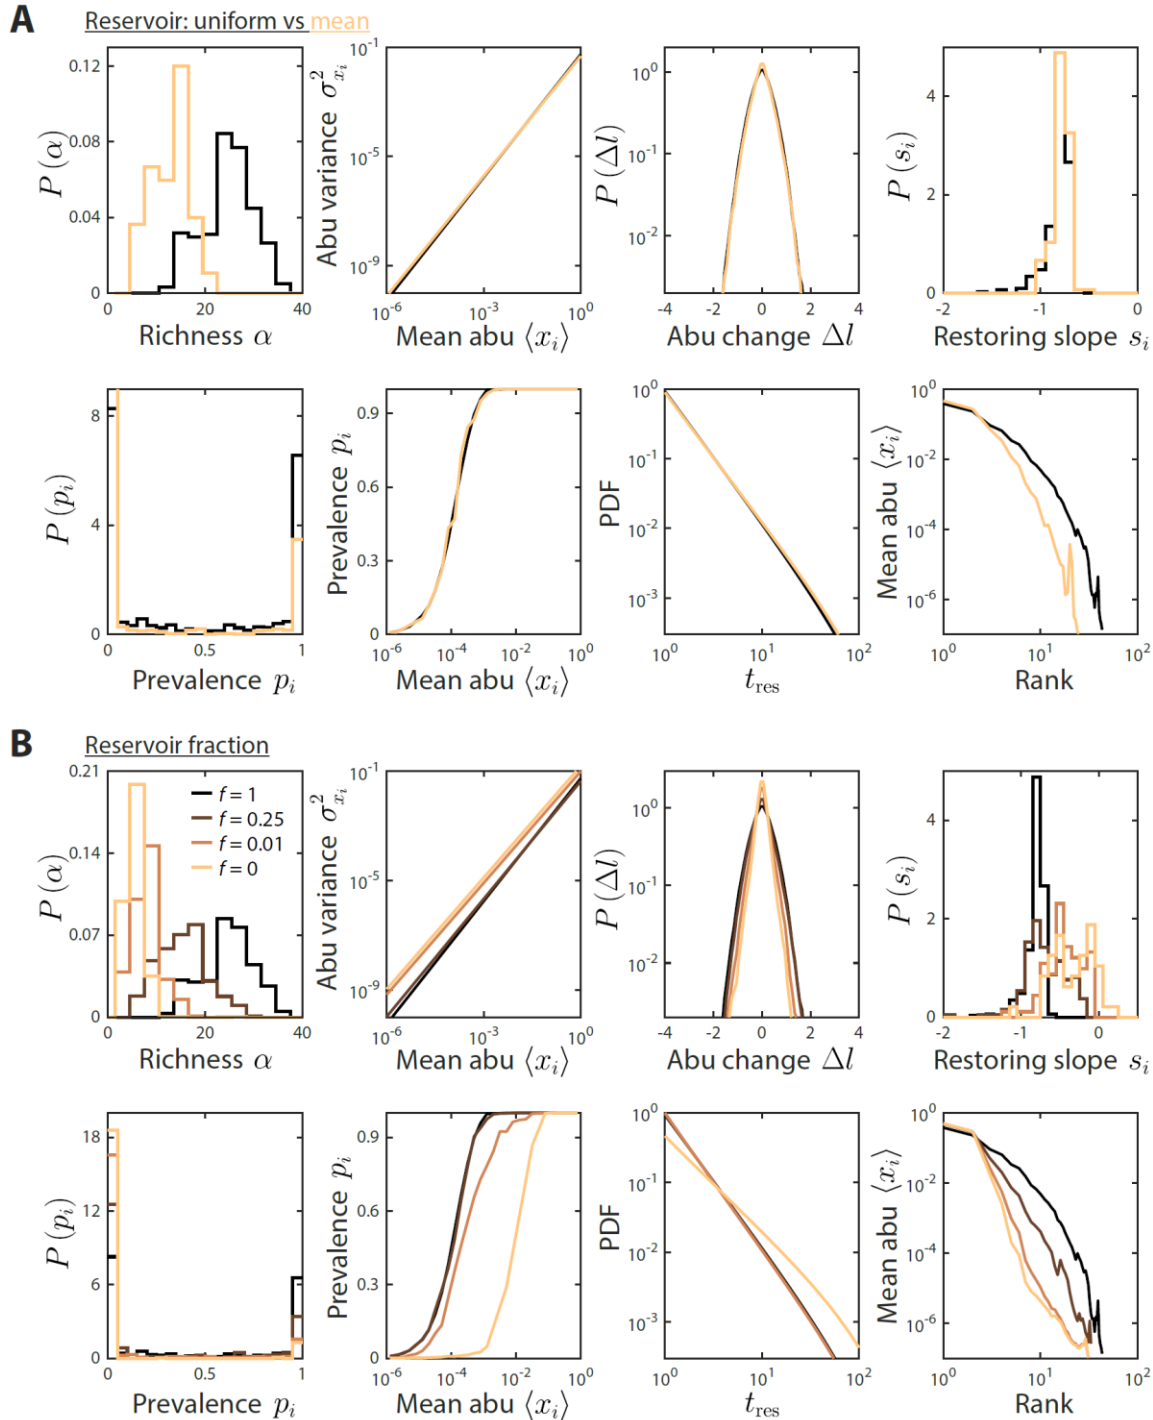

582

583 **Figure S2: Reservoir composition does not substantially affect time series**

584 **statistics.**

- 585 A) Depicted are mean model predictions using the parameter set in Fig. 1 and 2, with  
586 two definitions of the reservoir of consumers used to initialize the dynamics at each  
587 sampling time: a uniform reservoir in which all consumers are present at equal  
588 abundance (black), and a mean reservoir equal to the steady state composition  
589 given by the set point environment  $\bar{Y}_j$  initialized by a uniform reservoir (light brown).  
590 Most statistics were not substantially affected. The richness was lower when  
591 initializing with the mean reservoir, but the susceptibility of richness to model  
592 parameters is expected to remain qualitatively the same.
- 593 B) Depicted are mean model predictions with varying reservoir fraction  $f$ , in which  
594 initial consumer abundances during sampling time  $T$  were determined by a  
595 combination of the reservoir and the steady state at the previous sampling time,  
596  $f(\vec{1}/N) + (1 - f)(\vec{x}(T - 1))$ . Many statistics were substantially affected by the  
597 value of  $f$ . Notably, the contribution from the previous steady state introduces  
598 autocorrelations, thereby increasing the mean restoring slope. Moreover, the  
599 absence of a reservoir substantially decreased richness since low-abundance  
600 consumers cannot grow enough even when resource levels fluctuate in their favor.

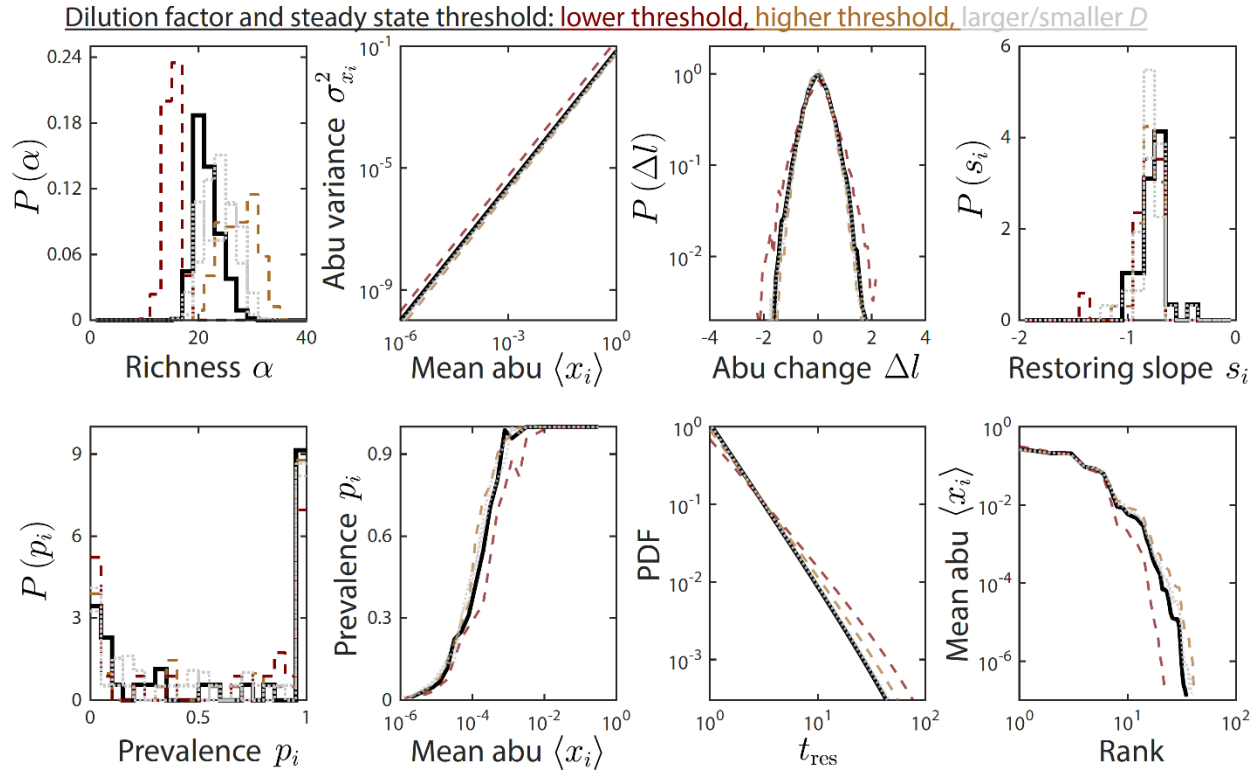

601  
 602 **Figure S2: The dilution factor and steady state threshold do not substantially affect**  
 603 **time series statistics.**

604 Depicted are time series statistics from one instance of the parameter set used in Figs. 1  
 605 and 2, simulated using a dilution factor  $D = 200$  and a steady state threshold of 5% (solid  
 606 black line),  $D = 40$  or  $D = 1,000$  (dotted gray lines), and a threshold of 1% and 10%  
 607 (dashed brown and orange lines, respectively).

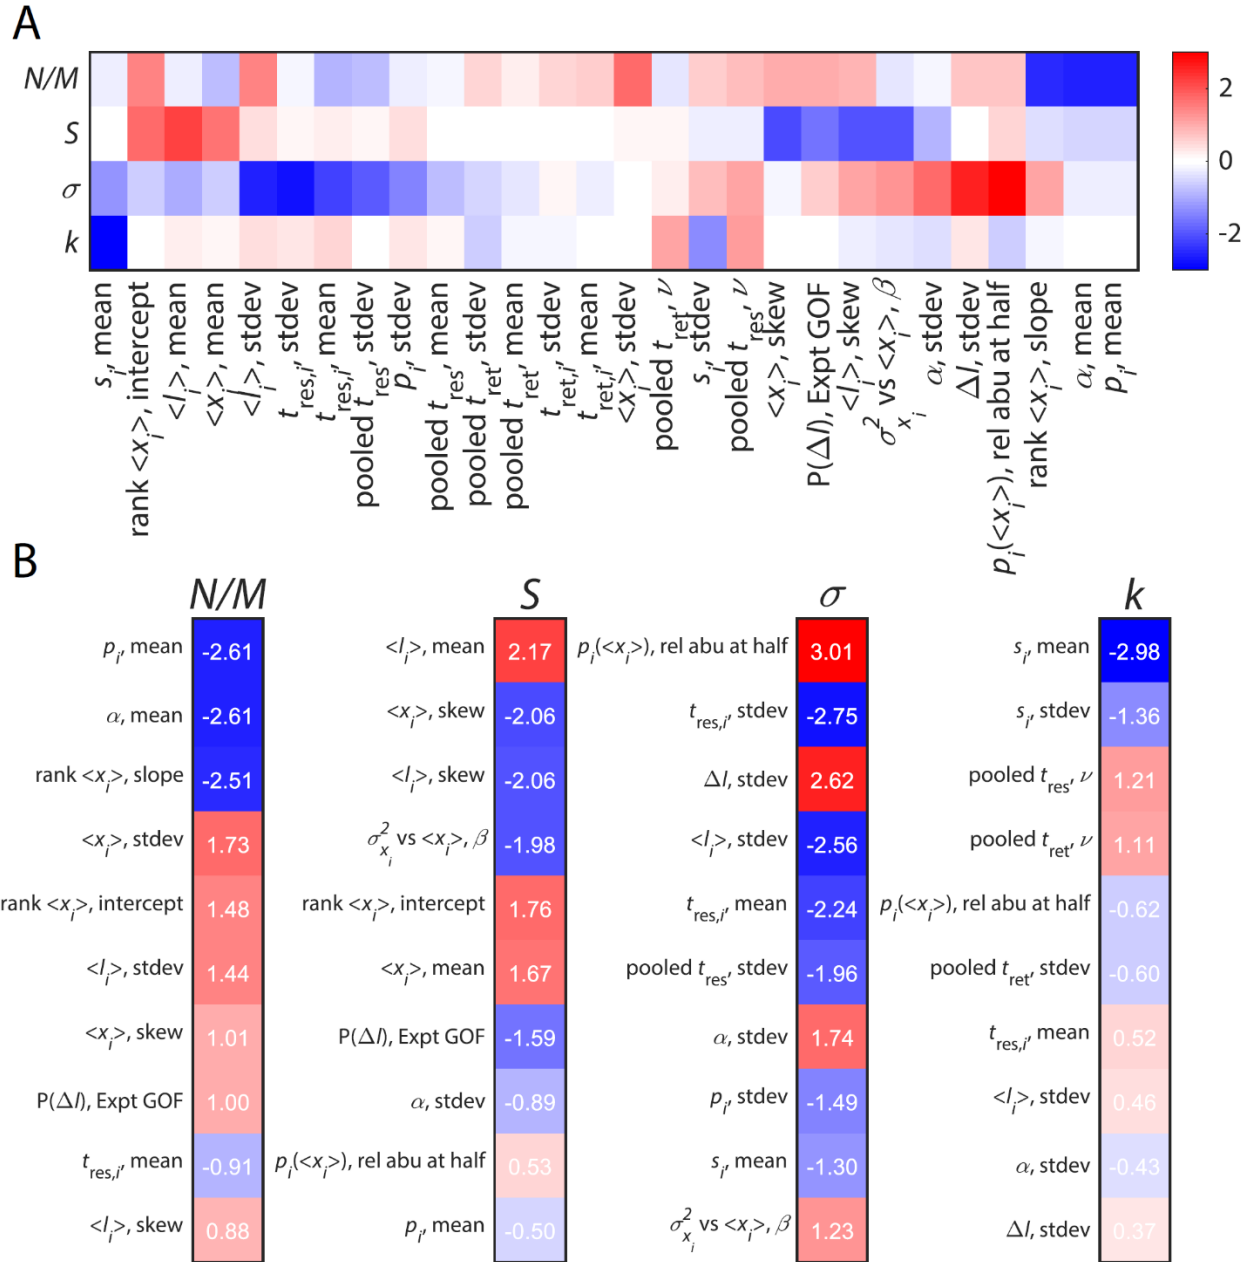

608

609

610

611

**Figure S3: Time series statistics are differentially susceptible to model parameters.** 28 time series statistics were clustered (A) and ranked (B) according to their susceptibilities to identify statistics that strongly constrain the values of key parameters.



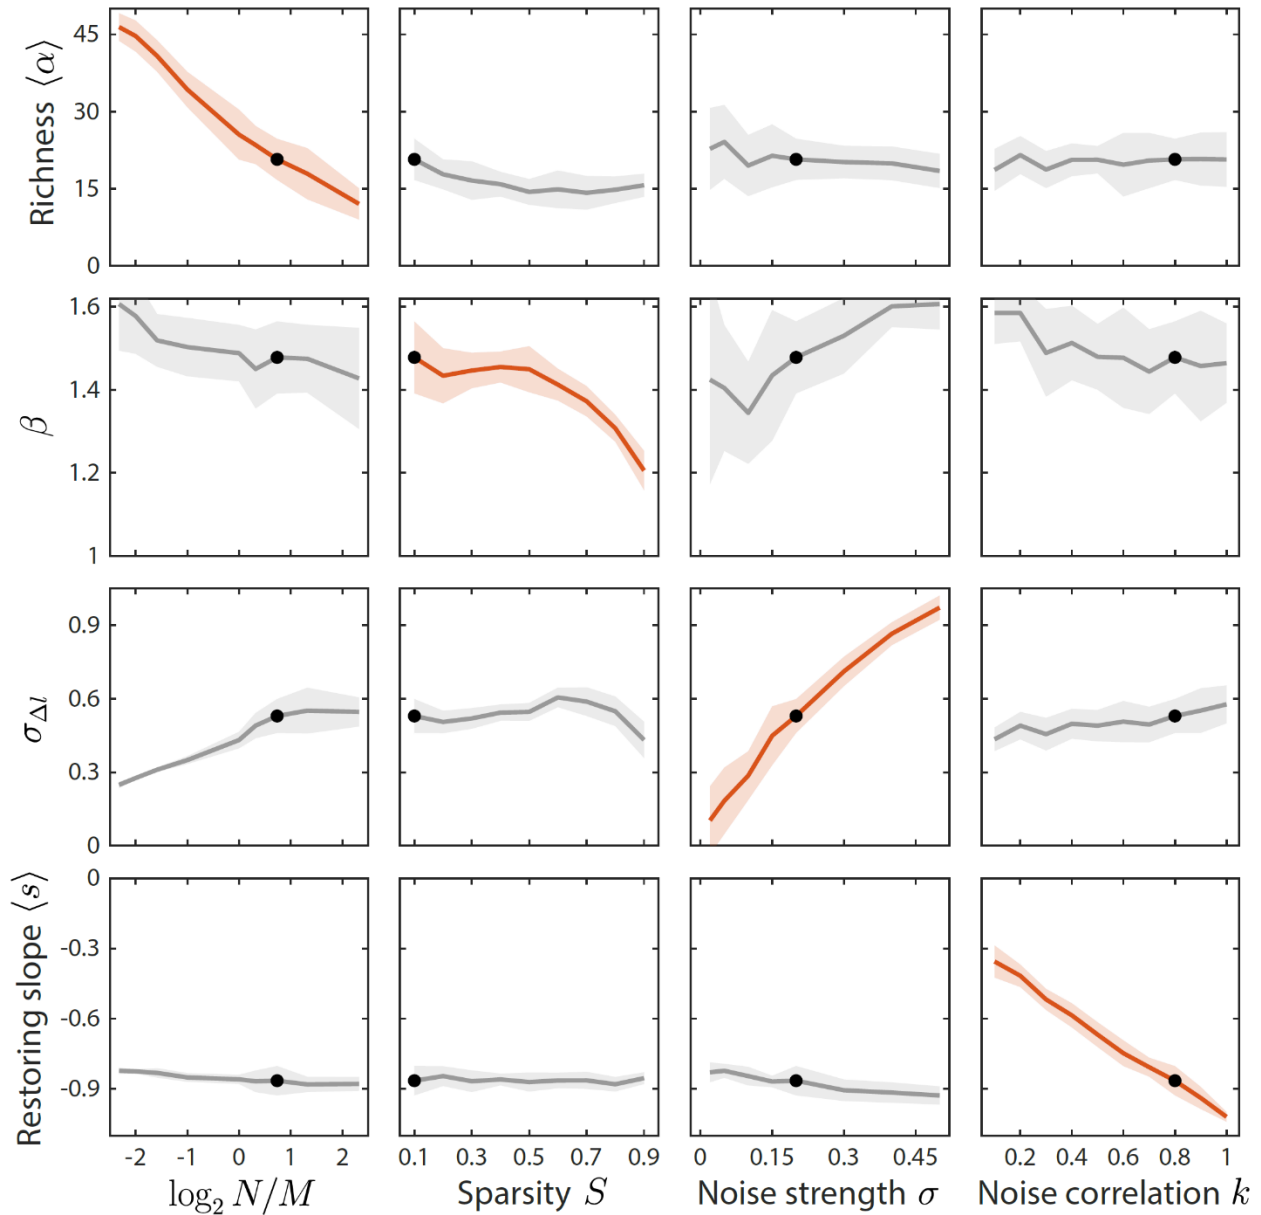

612

613 **Figure S4: Local susceptibilities behave similarly to their global counterparts.**

614 Shown are changes in time series statistics (y-axis) in response to changes in model  
615 parameters (x-axis) as in Fig. 3. Here, lines and shading show the mean and standard  
616 deviation of a statistic at the given parameter value with other parameters fixed to their  
617 best-fit values. Black dots denote the best-fit values.

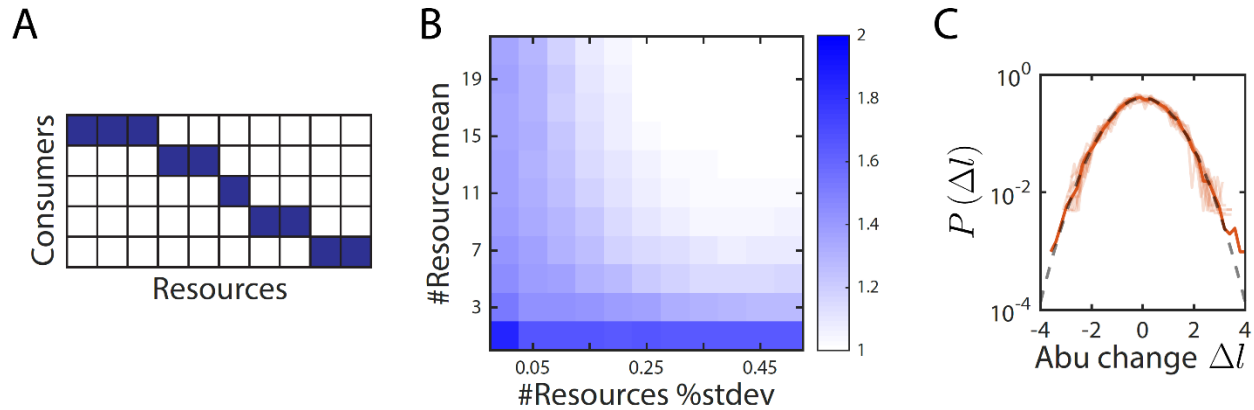

618

619 **Figure S5: The no-competition model provides an intuitive explanation of**  
620 **variations in the scaling exponent  $\beta$  between  $\sigma_{x_i}^2$  and  $\langle x_i \rangle$ .**

621 A) In the no-competition model, each consumer consumes a disjoint set of resources.

622 B) The mean and standard deviation of the number of resources consumed per  
623 consumer determine the scaling exponent  $\beta$ . Shown is the average value of  $\beta$  over  
624 1,000 random instances of the no-competition model, across values of the mean  
625 number of resources consumed per consumer (y-axis) and the standard deviation  
626 in the number of resources consumed divided by the mean (x-axis). In this  
627 example, the model involved 10 consumers. At high variance in the number of  
628 resources consumed,  $\beta \rightarrow 1$ , whereas at low variance,  $\beta$  varies between 1 and  $\approx$   
629 1.5 depending on the mean number of resources consumed.

630 C) Aggregate (solid orange line) and individual (light orange lines) distributions of  
631 abundance changes are normal (grey dashed line) in the no-competition model.  
632 The distributions of abundance changes, normalized by their sample standard  
633 deviations, are shown for an example simulation with  $7 \pm 1$  resources per consumer.

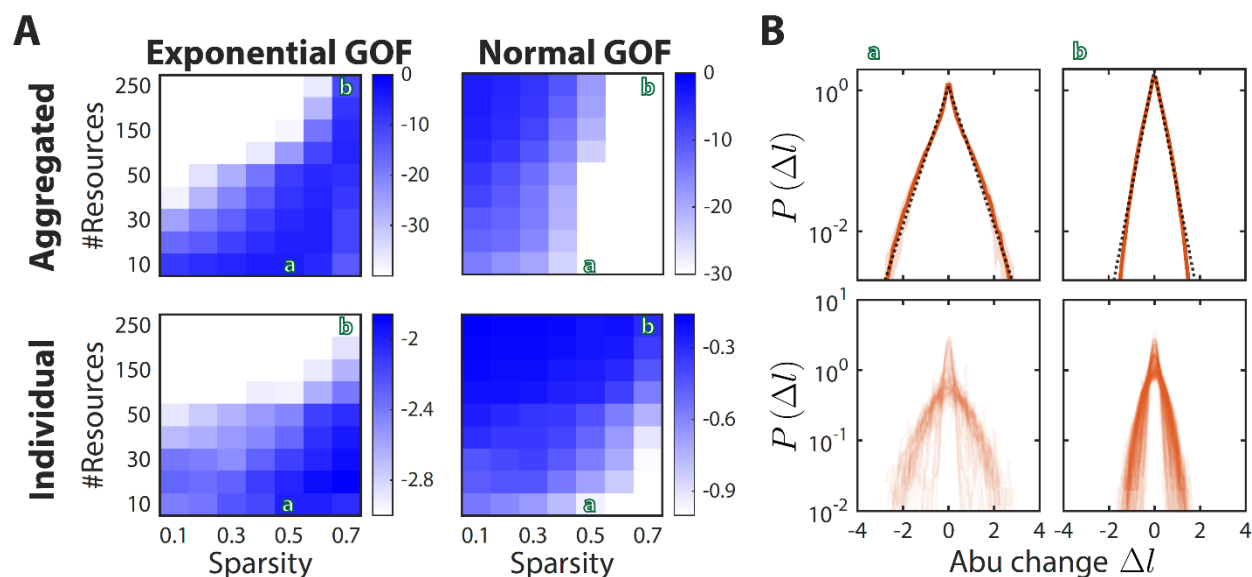

634

635 **Figure S6: Sparsity and the number of metabolites determine the shape of the**  
 636 **distribution of abundance changes  $P(\Delta l)$ .**

637 A) Shown is the average goodness of fit (as determined by the  $p$ -value of the  
 638 Kolmogorov-Smirnov test) of  $P(\Delta l)$  to an exponential (left) or a normal (right)  
 639 distribution, for the distribution aggregated over all consumers (top) or the median  
 640 value across the distributions of individual consumers (bottom). Larger values  
 641 (blue) denote better fits. Green letters denote examples shown in (B). The other  
 642 model parameters were fixed at  $(N, \sigma, k) = (50, 0.2, 0.8)$  as in Fig. 2.

643 B) Shown are two different regimes that result in an exponential distribution of  
 644 abundance changes. Example (a) demonstrates that when  $N/M > 1$ , the  
 645 aggregated distribution is better fit by an exponential (black dotted line) than by a  
 646 normal distribution (top), and that the median of the individual distributions is also  
 647 better fit by an exponential (bottom). Example (b) demonstrates that when  $N/M <$   
 648  $1$  and  $S$  is high, the aggregated distribution is still better fit by an exponential, but  
 649 the median of the individual distributions is better fit by a normal distribution.

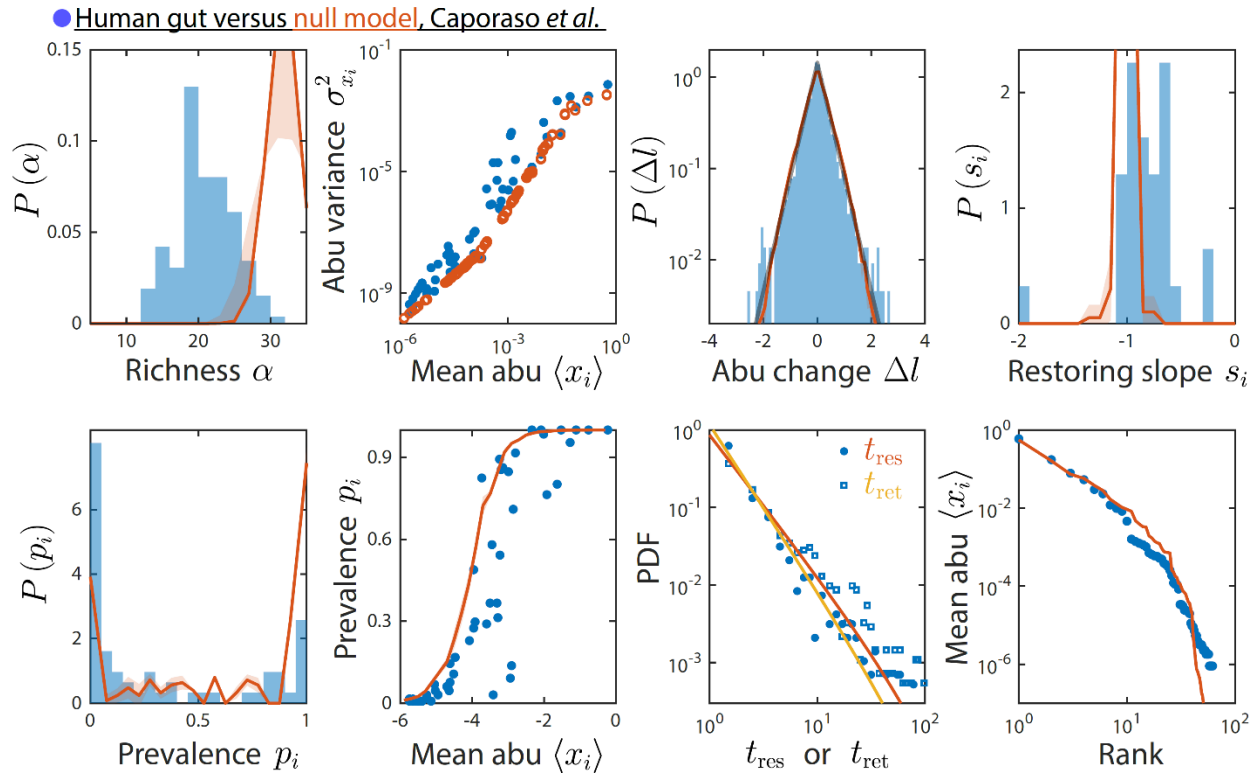

650

651 **Figure S7: A non-interacting null model reproduced some, but not all, time series**  
652 **statistics.**

653 Shown are data from Ref. <sup>9</sup> as in Fig. 2 and comparisons to a non-interacting null model  
654 in which consumer abundances were drawn from independent normal distributions whose  
655 mean and variance were extracted from data. As a result of its many inputs, the null model  
656 was able to reproduce statistics such as the rank distribution of abundances, but was  
657 unable to reproduce the distributions of residence and return time, nor the distribution of  
658 pairwise correlations (Fig. 4).

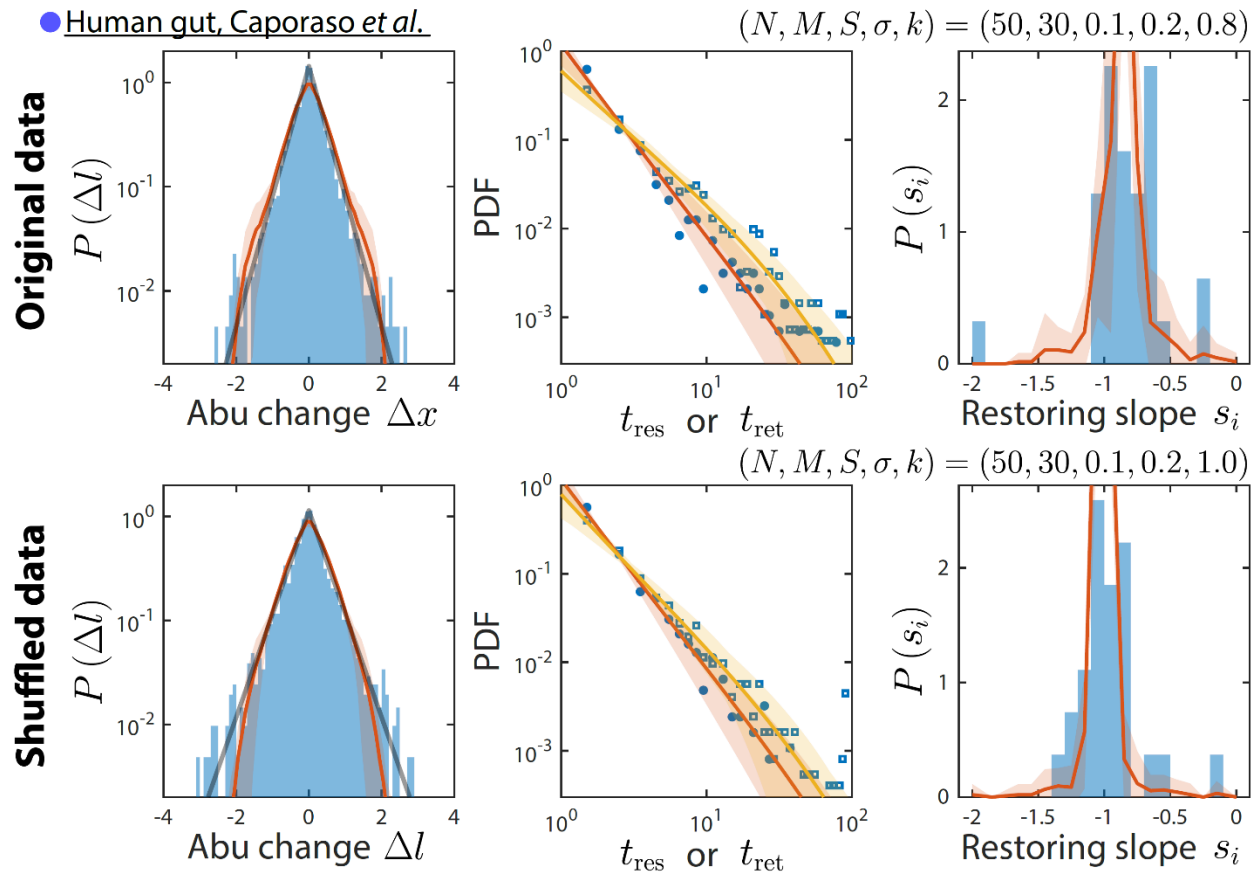

659

660 **Figure S8: Our mechanistic model is consistent with results obtained by shuffling**  
 661 **time labels.**

662 Shown are the original data from Ref. <sup>9</sup> and the best fit model predictions as in Fig. 2  
 663 (top), and the same data but with time labels shuffled (bottom). Only time series statistics  
 664 that are affected by shuffling time labels are shown. Model predictions are based on the  
 665 best fit parameters for the shuffled data, which were the same as for the original data  
 666 except  $k = 1$ . Shuffling led to more negative restoring slopes, as expected from  
 667 abolishing correlation between sampling times. The resulting mean restoring slope  
 668 yielded a best fit value of  $k = 1$ , which in turn predicted the distributions of residence  
 669 and return times after shuffling.

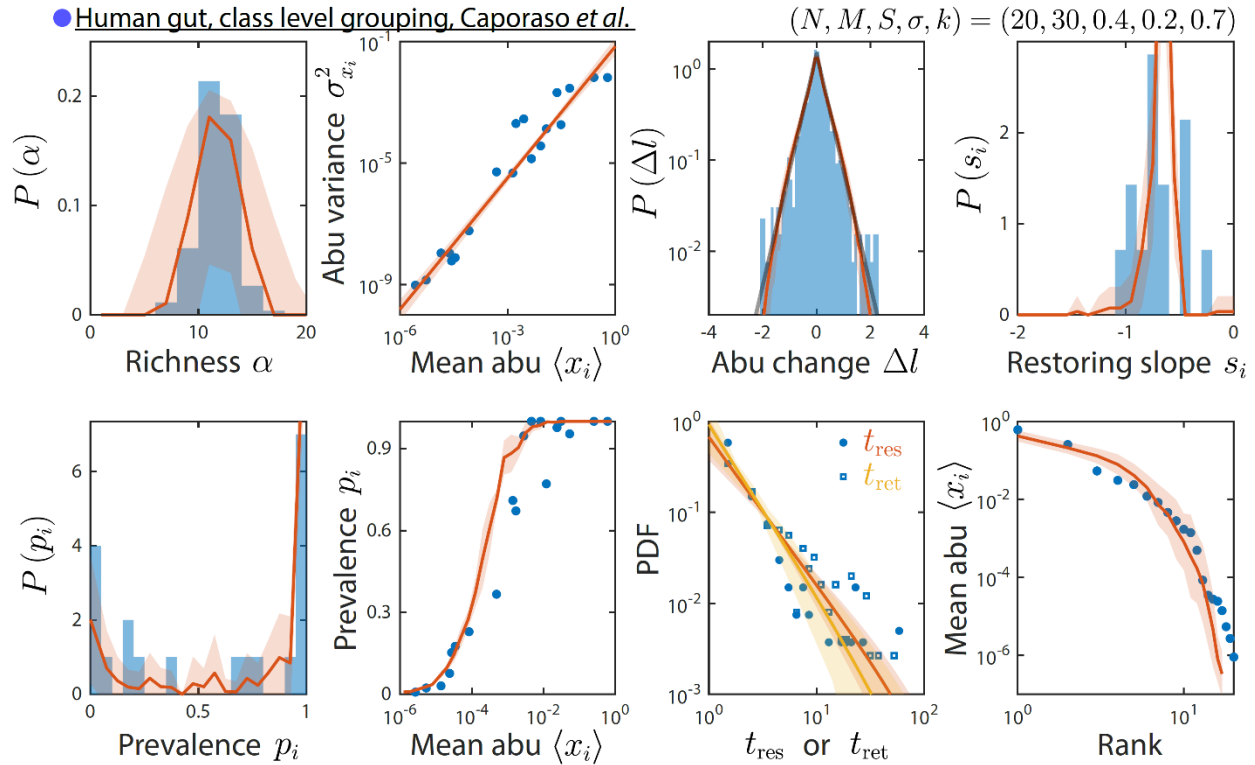

670

671 **Figure S9: Grouping at a lower-resolution taxonomic level results in similar time**  
 672 **series statistics.**

673 Shown are data from Ref. <sup>9</sup> as in Fig. 2, but grouped and analyzed at the class instead of  
 674 family level. The best fit model predictions are shown, with best fit parameters  
 675 ( $N, M, S, \sigma, k$ ) = (20,30,0.4,0.2,0.6).

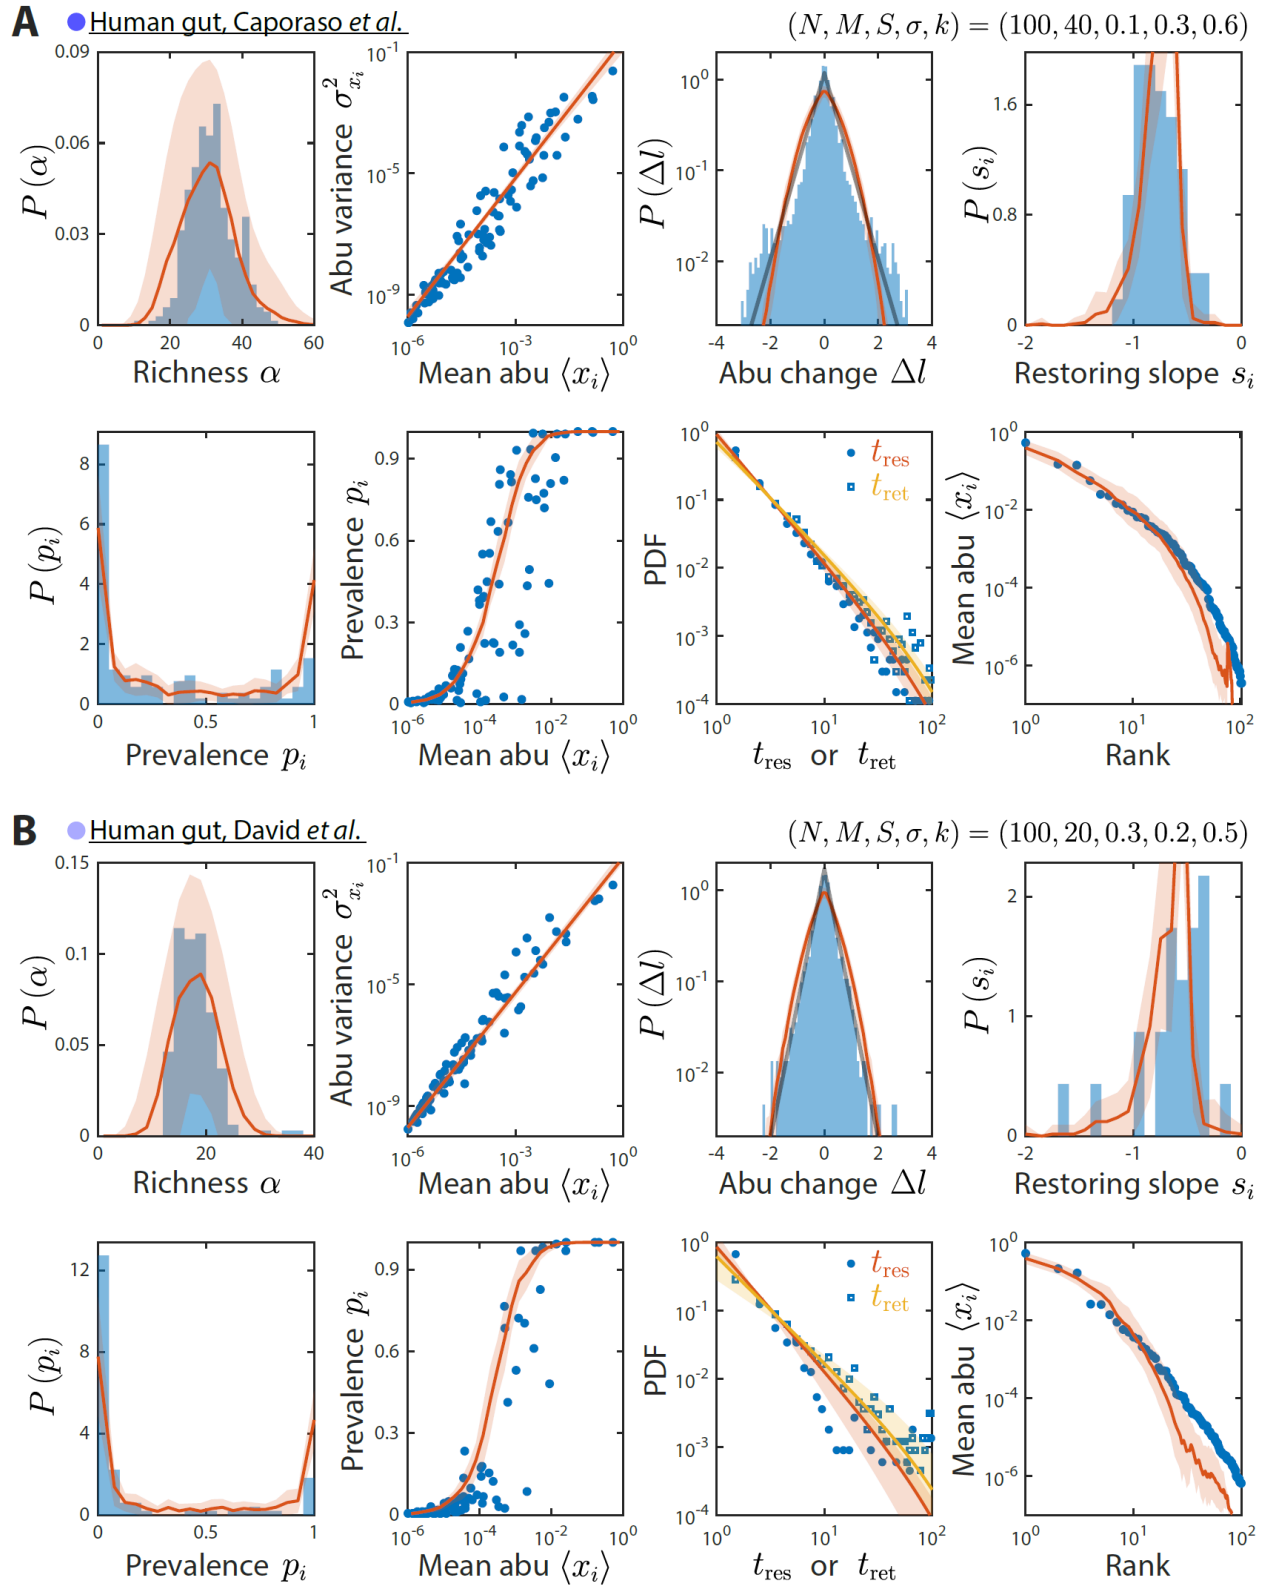



679 representative data sets (blue) from Ref. <sup>9</sup> (A) and Ref. <sup>10</sup> (B) and best fit model  
680 predictions (red).

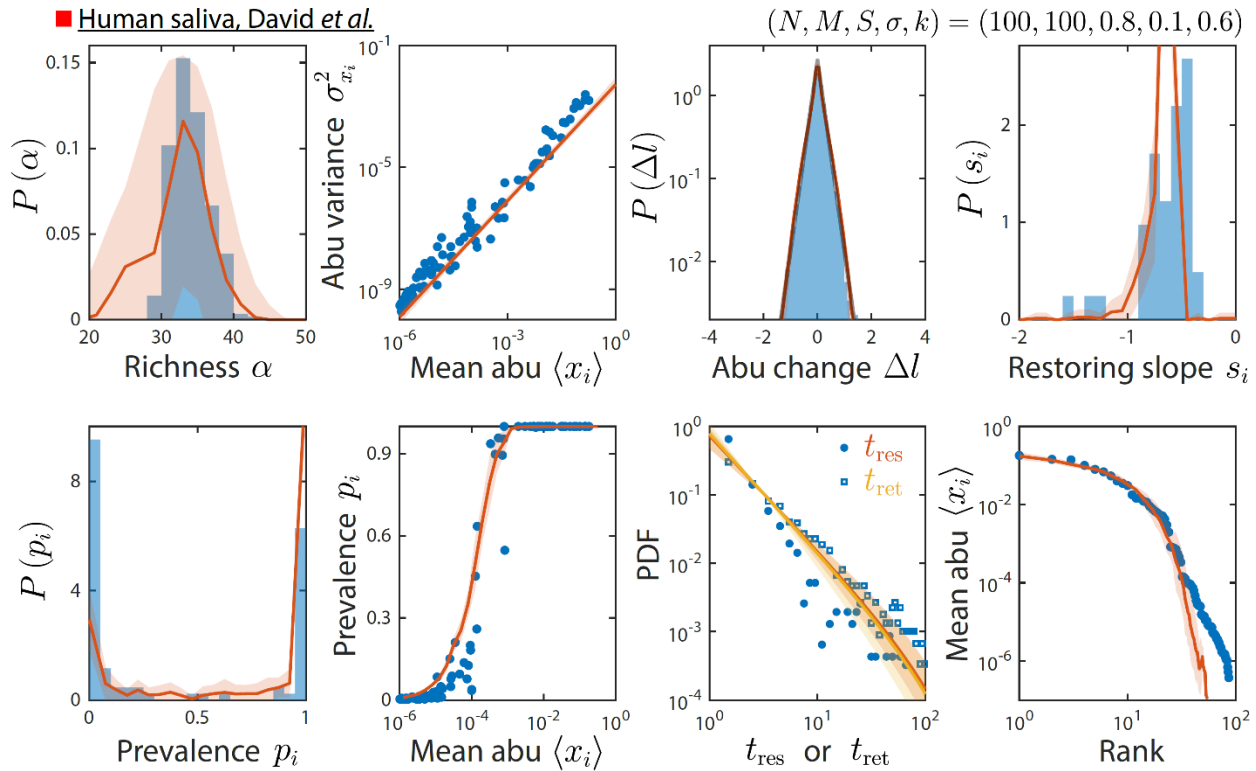

681

682 **Figure S11: Our model reproduces experimentally observed time series statistics**  
 683 **in a human saliva microbiota.** Shown are the same time series statistics as in Fig. 2 for  
 684 an experimental data set (blue) from Ref. <sup>10</sup> and best fit model predictions (red).

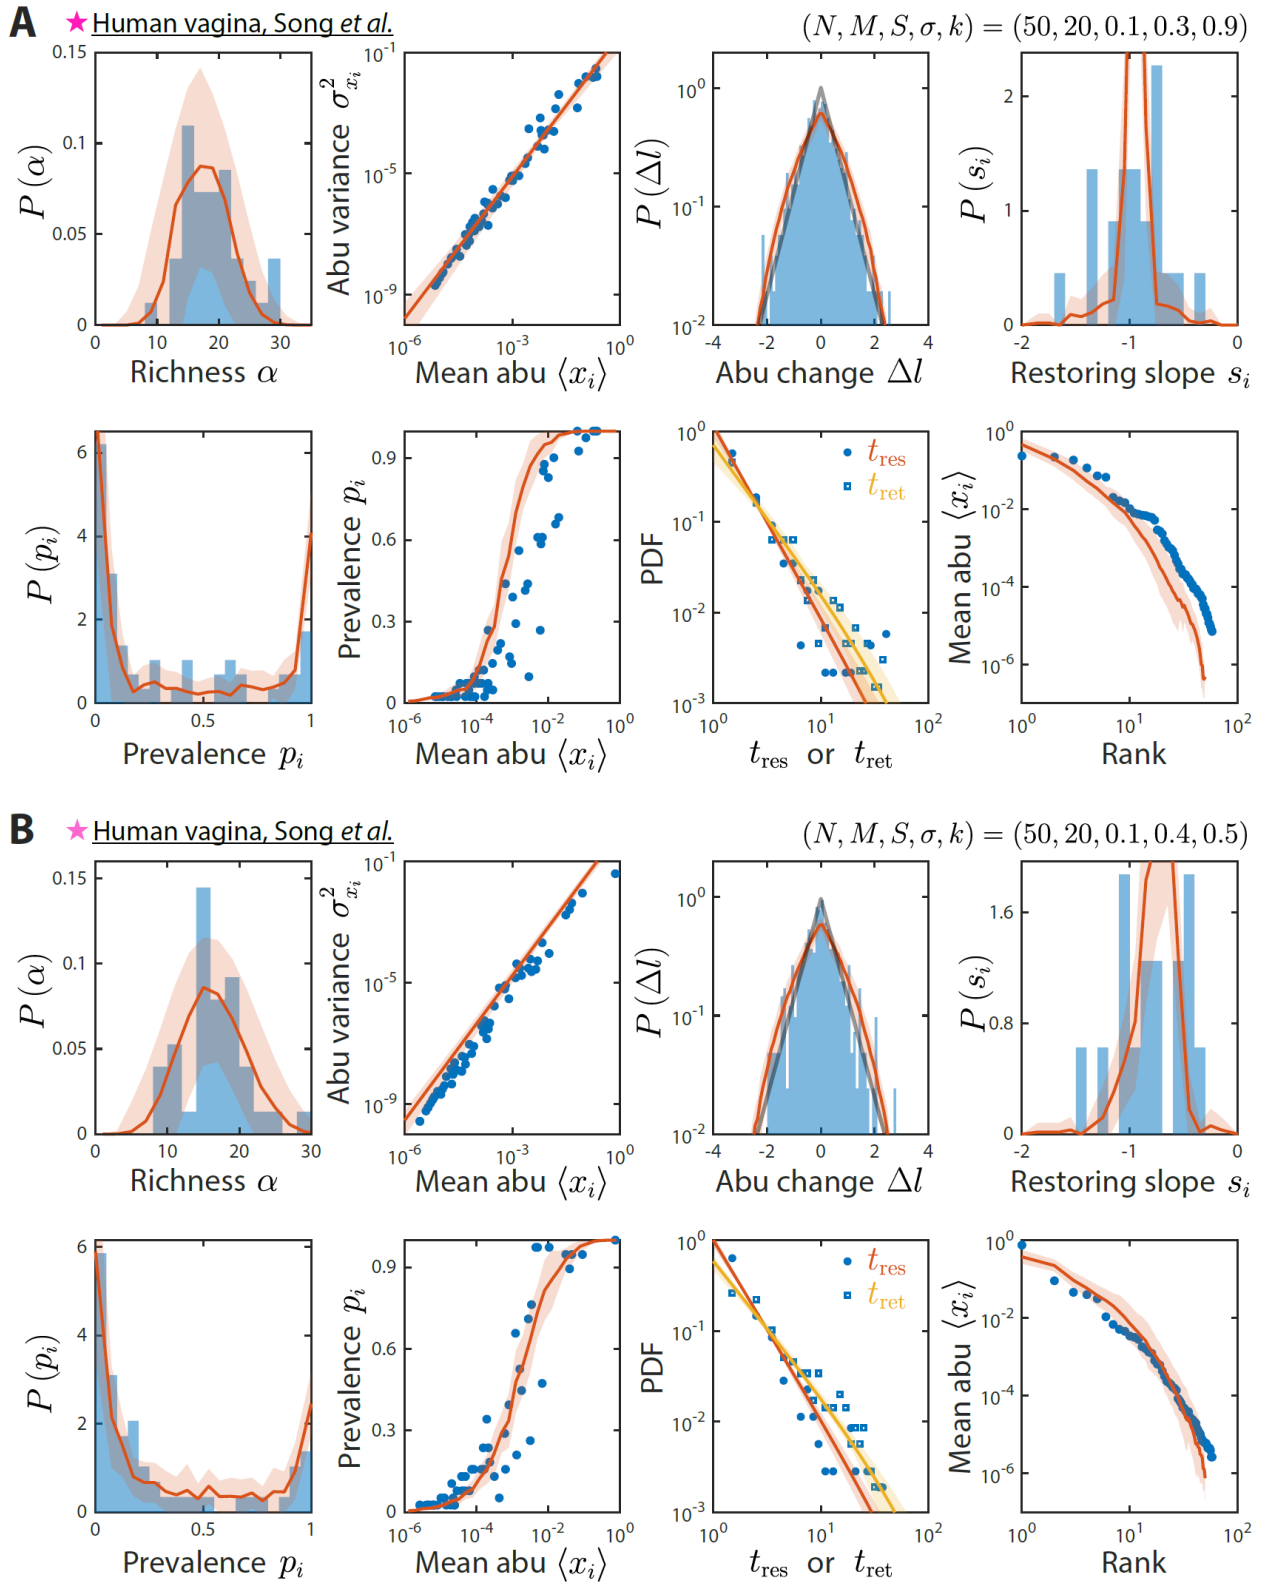

685

686

687

**Figure S12: Our model reproduces experimentally observed time series statistics in human vagina microbiotas.** Shown are the same time series statistics as in Fig. 2 for

688 representative data sets (blue) of vaginal microbiotas with high diversity (A) and  
689 dominated by *Lactobacillus iners* (B) from Ref. <sup>28</sup> and best fit model predictions (red).

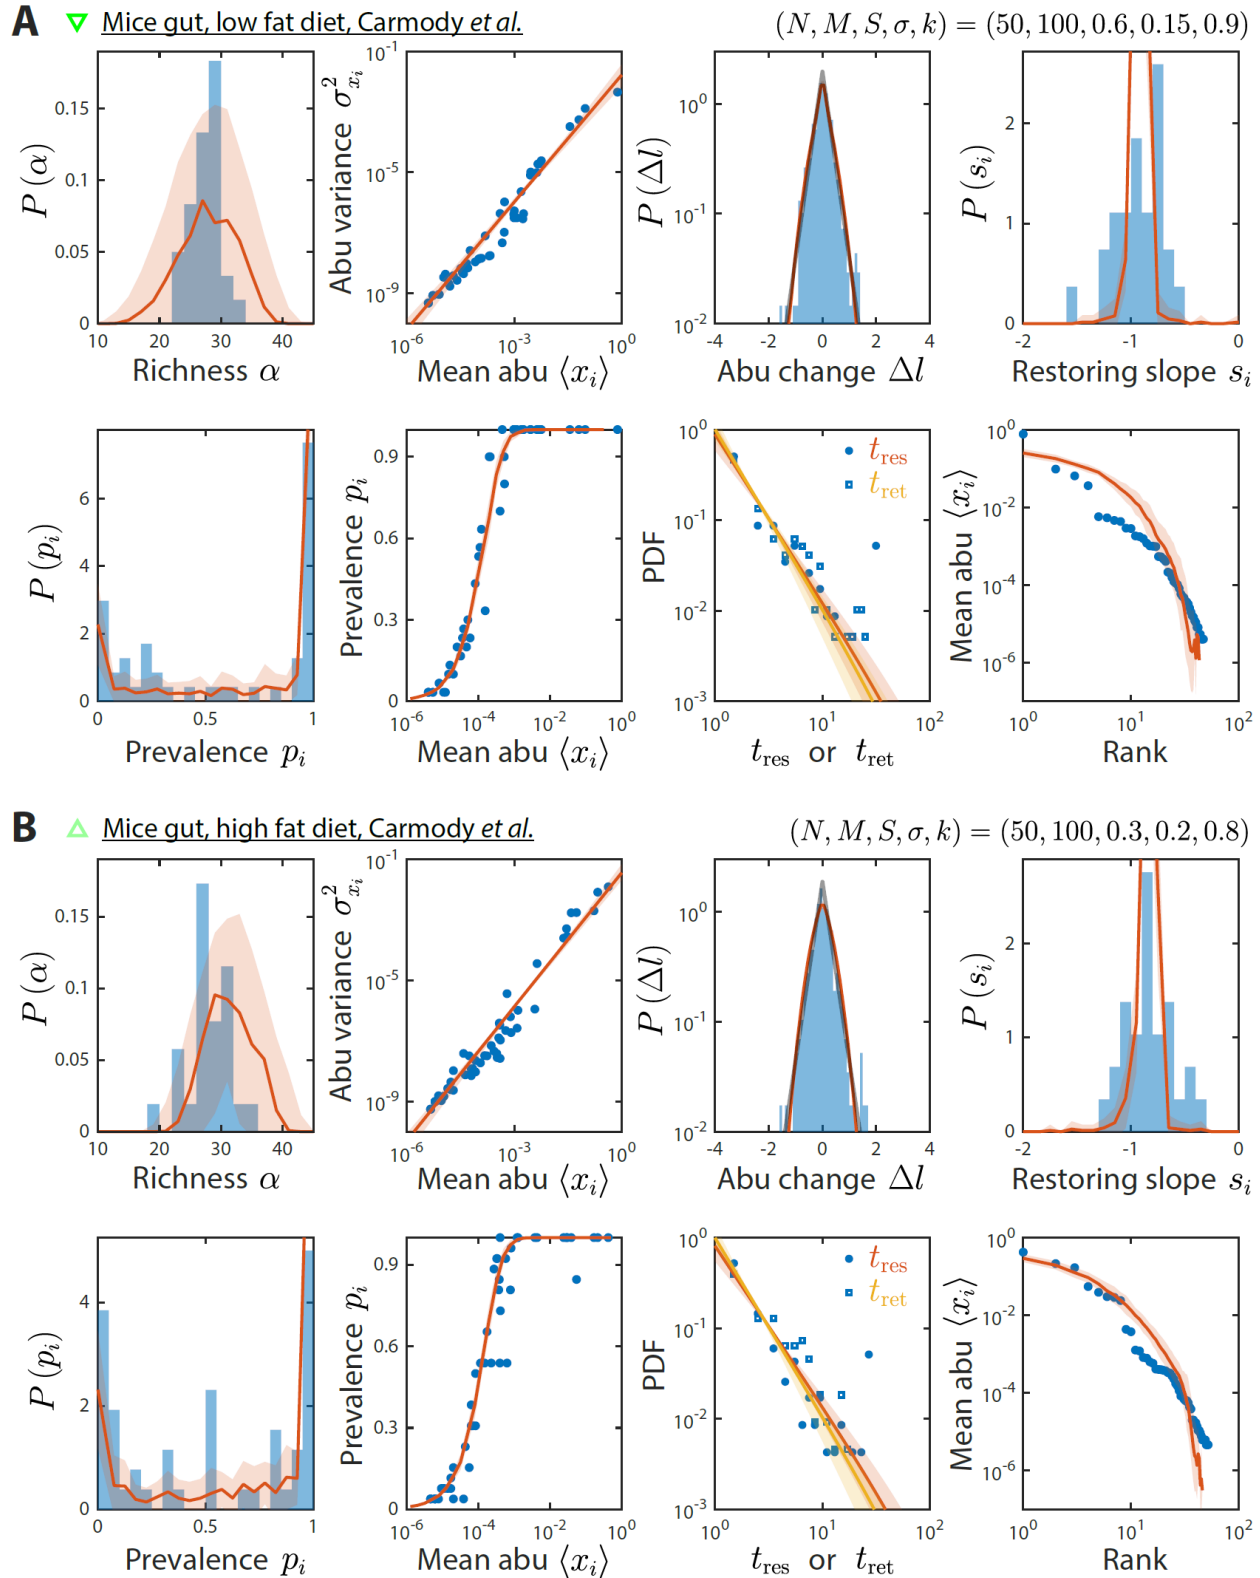

693 representative data sets (blue) of mice fed a low-fat (A) and high-fat diet (B) from Ref. <sup>27</sup>  
694 and best fit model predictions (red).

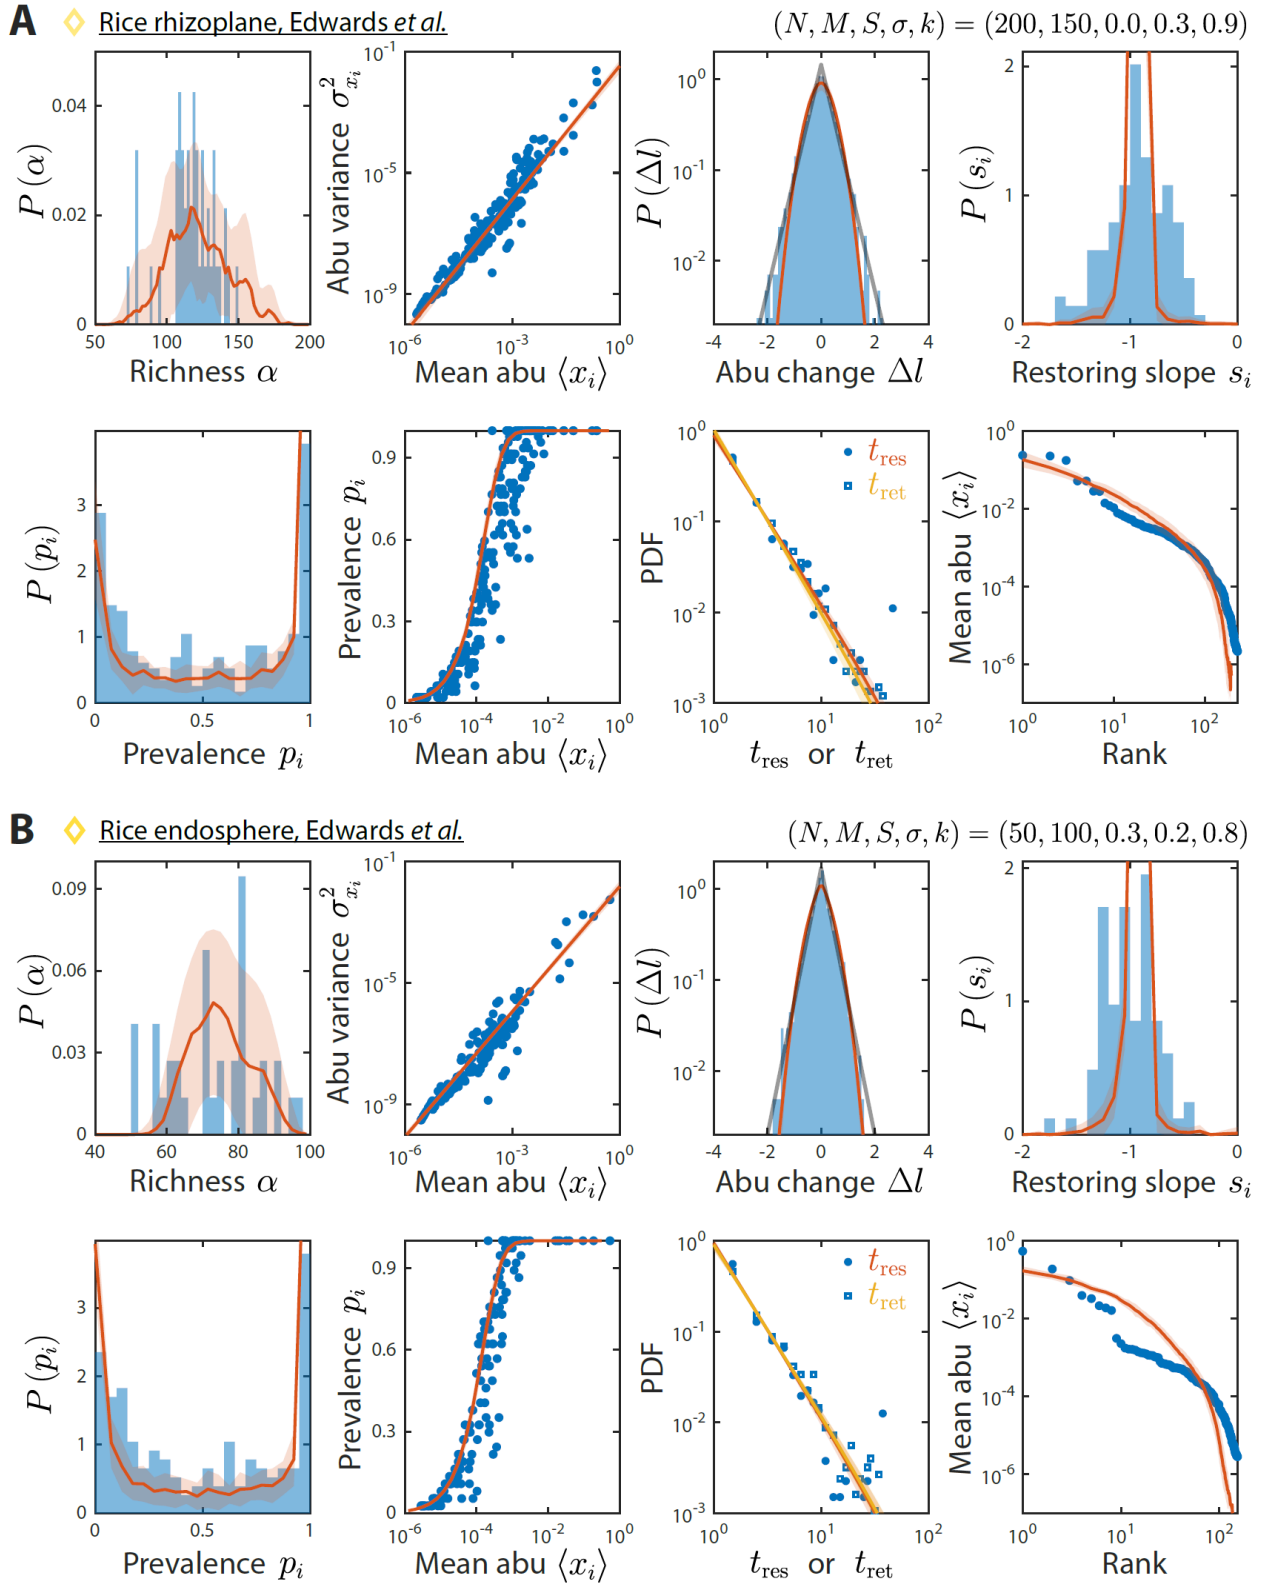

698 representative data sets (blue) of the rhizoplane (A) and endosphere (B) from Ref. <sup>29</sup> and  
699 best fit model predictions (red).



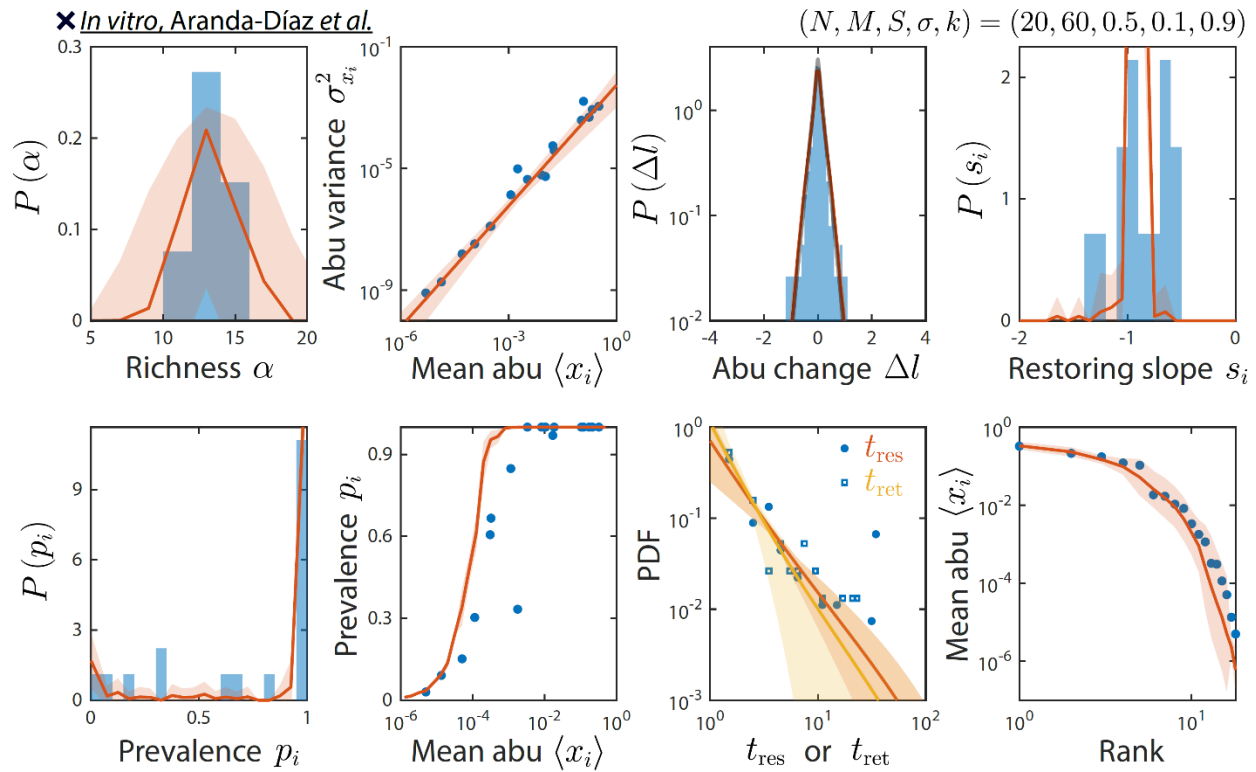

700

701 **Figure S15: Our model reproduces experimentally observed time series statistics**

702 **in an *in vitro*-passaged complex community.** Shown are the same time series statistics

703 as in Fig. 2 for representative data (blue) from Ref. <sup>30</sup> and best fit model predictions (red).

704 Note the lower value of  $s$  relative to other microbiotas.

705 **References**

- 706 1 Sekirov, I., Russell, S. L., Antunes, L. C. M. & Finlay, B. B. Gut microbiota in health  
707 and disease. *Physiological reviews* (2010).
- 708 2 Tkacz, A. & Poole, P. Role of root microbiota in plant productivity. *Journal of*  
709 *experimental botany* **66**, 2167-2175 (2015).
- 710 3 Chesson, P. MacArthur's consumer-resource model. *Theoretical Population*  
711 *Biology* **37**, 26-38 (1990).
- 712 4 Posfai, A., Taillefumier, T. & Wingreen, N. S. Metabolic trade-offs promote diversity  
713 in a model ecosystem. *Physical review letters* **118**, 028103 (2017).
- 714 5 Tikhonov, M. & Monasson, R. Collective Phase in Resource Competition in a  
715 Highly Diverse Ecosystem. *Physical Review Letters* **118**, 048103,  
716 doi:10.1103/PhysRevLett.118.048103 (2017).
- 717 6 Goldford, J. E. *et al.* Emergent simplicity in microbial community assembly.  
718 *Science* **361**, 469-474 (2018).
- 719 7 Liao, C., Wang, T., Maslov, S. & Xavier, J. B. Modeling microbial cross-feeding at  
720 intermediate scale portrays community dynamics and species coexistence. *PLoS*  
721 *computational biology* **16**, e1008135 (2020).
- 722 8 Faith, J. J. *et al.* The Long-Term Stability of the Human Gut Microbiota. *Science*  
723 **341**, 1237439, doi:10.1126/science.1237439 (2013).
- 724 9 Caporaso, J. G. *et al.* Moving pictures of the human microbiome. *Genome Biology*  
725 **12**, R50, doi:10.1186/gb-2011-12-5-r50 (2011).
- 726 10 David, L. A. *et al.* Host lifestyle affects human microbiota on daily timescales.  
727 *Genome Biology* **15**, R89, doi:10.1186/gb-2014-15-7-r89 (2014).
- 728 11 Ji, B. W., Sheth, R. U., Dixit, P. D., Tchourine, K. & Vitkup, D. Macroecological  
729 dynamics of gut microbiota. *Nature Microbiology* **5**, 768-775, doi:10.1038/s41564-  
730 020-0685-1 (2020).
- 731 12 Grilli, J. Macroecological laws describe variation and diversity in microbial  
732 communities. *Nature communications* **11**, 1-11 (2020).
- 733 13 Descheemaeker, L. & De Buyl, S. Stochastic logistic models reproduce  
734 experimental time series of microbial communities. *Elife* **9**, e55650 (2020).

- 735 14 Shoemaker, W. R., Locey, K. J. & Lennon, J. T. A macroecological theory of  
736 microbial biodiversity. *Nature Ecology & Evolution* **1**, 0107, doi:10.1038/s41559-  
737 017-0107 (2017).
- 738 15 Taylor, L. R. Aggregation, variance and the mean. *Nature* **189**, 732-735 (1961).
- 739 16 Gibbons, S. M., Kearney, S. M., Smillie, C. S. & Alm, E. J. Two dynamic regimes  
740 in the human gut microbiome. *PLoS computational biology* **13**, e1005364 (2017).
- 741 17 Levy, R. *et al.* Longitudinal analysis reveals transition barriers between dominant  
742 ecological states in the gut microbiome. *Proceedings of the National Academy of*  
743 *Sciences* **117**, 13839-13845 (2020).
- 744 18 Azaele, S., Pigolotti, S., Banavar, J. R. & Maritan, A. Dynamical evolution of  
745 ecosystems. *Nature* **444**, 926-928 (2006).
- 746 19 Good, B. H., Martis, S. & Hallatschek, O. Adaptation limits ecological diversification  
747 and promotes ecological tinkering during the competition for substitutable  
748 resources. *Proceedings of the National Academy of Sciences* **115**, E10407-  
749 E10416 (2018).
- 750 20 Erez, A., Lopez, J. G., Weiner, B. G., Meir, Y. & Wingreen, N. S. Nutrient levels  
751 and trade-offs control diversity in a serial dilution ecosystem. *Elife* **9**, e57790  
752 (2020).
- 753 21 Ng, K. M. *et al.* Recovery of the gut microbiota after antibiotics depends on host  
754 diet, community context, and environmental reservoirs. *Cell host & microbe* **26**,  
755 650-665 (2019).
- 756 22 Louca, S., Parfrey, L. W. & Doebeli, M. Decoupling function and taxonomy in the  
757 global ocean microbiome. *Science* **353**, 1272-1277 (2016).
- 758 23 Tian, L. *et al.* Deciphering functional redundancy in the human microbiome. *Nature*  
759 *communications* **11**, 1-11 (2020).
- 760 24 Callahan, B. J. *et al.* DADA2: high-resolution sample inference from Illumina  
761 amplicon data. *Nature methods* **13**, 581-583 (2016).
- 762 25 Allen, A. P., Li, B. L. & Charnov, E. L. Population fluctuations, power laws and  
763 mixtures of lognormal distributions. *Ecology Letters* **4**, 1-3 (2001).

- 764 26 Wang, X.-W. & Liu, Y.-Y. Characterizing scaling laws in gut microbial dynamics  
765 from time series data: caution is warranted. *bioRxiv*, 2021.2001.2011.426045,  
766 doi:10.1101/2021.01.11.426045 (2021).
- 767 27 Carmody, R. N. *et al.* Diet dominates host genotype in shaping the murine gut  
768 microbiota. *Cell host & microbe* **17**, 72-84 (2015).
- 769 28 Song, S. D. *et al.* Daily Vaginal Microbiota Fluctuations Associated with Natural  
770 Hormonal Cycle, Contraceptives, Diet, and Exercise. *mSphere* **5**, e00593-00520,  
771 doi:10.1128/mSphere.00593-20 (2020).
- 772 29 Edwards, J. A. *et al.* Compositional shifts in root-associated bacterial and archaeal  
773 microbiota track the plant life cycle in field-grown rice. *PLoS biology* **16**, e2003862  
774 (2018).
- 775 30 Aranda-Díaz, A. *et al.* High-throughput cultivation of stable, diverse, fecal-derived  
776 microbial communities to model the intestinal microbiota. *bioRxiv*,  
777 2020.2007.2006.190181, doi:10.1101/2020.07.06.190181 (2020).
- 778 31 Li, Z. *et al.* Modeling microbial metabolic trade-offs in a chemostat. *PLoS*  
779 *computational biology* **16**, e1008156 (2020).
- 780 32 Machado, D. *et al.* Polarization of microbial communities between competitive and  
781 cooperative metabolism. *Nature Ecology & Evolution*, 1-9 (2021).
- 782 33 Arkin, A. P. *et al.* KBase: the United States department of energy systems biology  
783 knowledgebase. *Nature biotechnology* **36**, 566-569 (2018).
- 784 34 Pollak, S. *et al.* Public good exploitation in natural bacterioplankton communities.  
785 *bioRxiv* (2020).
- 786 35 Ratzke, C. & Gore, J. Modifying and reacting to the environmental pH can drive  
787 bacterial interactions. *PLoS biology* **16**, e2004248 (2018).
- 788 36 Aranda-Díaz, A. *et al.* Bacterial interspecies interactions modulate pH-mediated  
789 antibiotic tolerance. *Elife* **9**, e51493 (2020).
- 790 37 Lax, S., Abreu, C. I. & Gore, J. Higher temperatures generically favour slower-  
791 growing bacterial species in multispecies communities. *Nature ecology & evolution*  
792 **4**, 560-567 (2020).
- 793 38 Cesar, S. *et al.* Bacterial Evolution in High-Osmolarity Environments. *Mbio* **11**  
794 (2020).

- 795 39 Zhao, S. *et al.* Adaptive evolution within gut microbiomes of healthy people. *Cell*  
796 *host & microbe* **25**, 656-667 (2019).
- 797 40 Garud, N. R., Good, B. H., Hallatschek, O. & Pollard, K. S. Evolutionary dynamics  
798 of bacteria in the gut microbiome within and across hosts. *PLoS biology* **17**,  
799 e3000102 (2019).
- 800 41 Yaffe, E. & Relman, D. A. Tracking microbial evolution in the human gut using Hi-  
801 C reveals extensive horizontal gene transfer, persistence and adaptation. *Nature*  
802 *microbiology* **5**, 343-353 (2020).
- 803
